# Supplementary material
Source: MDPI journal article supplement (https://www.mdpi.com/2073-4441/14/17/2691)
Supplement: s1 [file s1]

## ENCUESTA A NIVEL DE HOGARES - RURAL

|                                                             |    |
|-------------------------------------------------------------|----|
| CONSENTIMIENTO Y DETALLES DE LA ENTREVISTA .....            | 2  |
| IDENTIFICACIÓN BOLETA .....                                 | 2  |
| IDENTIFICACIÓN HOGAR .....                                  | 2  |
| CARACTERIZACIÓN HOGAR .....                                 | 3  |
| SECCIÓN 1. CARACTERÍSTICAS GENERALES DEL ENTREVISTADO ..... | 3  |
| SECCIÓN 2. EDUCACIÓN .....                                  | 3  |
| SECCIÓN 3. EMPLEO, INGRESOS Y BIENES MATERIALES .....       | 4  |
| SECCIÓN 4. CARACTERÍSTICAS GENERALES DEL HOGAR .....        | 5  |
| SECCIÓN 5. CARACTERÍSTICAS DE LA VIVIENDA .....             | 6  |
| SECCIÓN 6. SERVICIOS BÁSICOS EN EL HOGAR .....              | 6  |
| 6.1 Electricidad y combustible de cocina .....              | 6  |
| 6.2 Agua .....                                              | 7  |
| 6.3 Saneamiento e higiene .....                             | 14 |
| 6.4 Manejo de residuos sólidos .....                        | 17 |
| SECCIÓN 7. SALUD .....                                      | 18 |
| SECCIÓN 8 . TENENCIA, ACCESO Y USO DE LA TIERRA .....       | 18 |
| SECCIÓN 9. AGRICULTURA Y RIEGO .....                        | 19 |
| SECCIÓN 10. GANADERÍA .....                                 | 22 |
| SECCIÓN 11. MINERÍA .....                                   | 23 |
| SECCIÓN 12. SEGURIDAD HUMANA .....                          | 23 |
| 12.1 Seguridad alimentaria .....                            | 23 |
| 12.2 Riesgos climáticos y problemas ambientales .....       | 24 |
| 12.3 Relación comunitaria .....                             | 25 |
| 12.4 Conflictos .....                                       | 25 |
| FIN DE LA ENCUESTA Y CALIDAD DE LA INFORMACIÓN .....        | 25 |

## CONSENTIMIENTO Y DETALLES DE LA ENTREVISTA

Estoy trabajando con el Instituto del Ambiente de Estocolmo y HELVETAS Bolivia, como parte de un estudio en la cuenca Tupiza. El objetivo es conocer las características de la población que vive en la cuenca, las actividades económicas que realizan y los servicios de agua potable y saneamiento con los que cuentan. Para ello, estamos realizando una encuesta a algunos hogares seleccionados, donde hacemos preguntas a los tomadores de decisión/jefe o jefa de hogar. Esto nos permitirá tener mejor información y conocimiento de la situación actual de las familias que habitan las comunidades que forman parte de la cuenca, incluyendo la ciudad de Tupiza.

En este punto, nos gustaría hacerle algunas preguntas con respecto a los miembros de su hogar que nos ayudarán a determinar con quién hablar para la encuesta. Tenga en cuenta que todas sus respuestas serán anónimas y estrictamente confidenciales. Su nombre no aparecerá en los datos que se hagan públicos. Usted puede retirarse de la encuesta en cualquier momento y si hay preguntas que prefiere no responder, entonces respetamos su derecho a no responderlas.

## IDENTIFICACIÓN BOLETA

|                                              |  |                                                   |  |
|----------------------------------------------|--|---------------------------------------------------|--|
| 1. Código boleta                             |  | 2. Fecha de la entrevista                         |  |
| 3a. Hora de inicio de la entrevista (hh:mm)  |  | 3b. Hora de finalización de la entrevista (hh:mm) |  |
| 4. Nombre/código del (de la) encuestador(a): |  | 5. Nombre/código del (de la) supervisor(a):       |  |

## IDENTIFICACIÓN HOGAR

|                                   |                             |                                                                                                      |                        |                   |                     |  |
|-----------------------------------|-----------------------------|------------------------------------------------------------------------------------------------------|------------------------|-------------------|---------------------|--|
| 6. Código del hogar               |                             |                                                                                                      |                        |                   |                     |  |
| 7. Municipio                      |                             | __Tupiza                    __Atocha -> Ir a Pg. 8.2.                    __Colcha K -> Ir a Pg. 8.3. |                        |                   |                     |  |
| 8.1. Comunidades <b>de Tupiza</b> |                             | 1. Chillcobija                                                                                       | 9. Casa Vieja          | 17. Yurcuma       | 25. Choroma         |  |
|                                   |                             | 2. Chillco A                                                                                         | 10. Gallego            | 18. Palala Baja   | 26. Charahota       |  |
|                                   |                             | 3. Cruz Pampa                                                                                        | 11. Oploca             | 19. Bolívar       | 27. Caracota        |  |
|                                   |                             | 4. Oro Ingenio                                                                                       | 12. Villa Providencia  | 20. Palala Alta   | 28. San Miguel      |  |
|                                   |                             | 5. Torre Wayco                                                                                       | 13. San Jose de Hornos | 21. Pilquiza      | 29. Salo            |  |
|                                   |                             | 6. Chocaya                                                                                           | 14. Entre Rios         | 22. Tambillo Bajo | 30. La Torre        |  |
|                                   |                             | 7. San Gerardo                                                                                       | 15. Angostura          | 23. Tambillo Alto | 31. Almona          |  |
|                                   |                             | 8. Torre Chica                                                                                       | 16. Santa Elena        | 24. Monte Rico    | 32. Chillco B       |  |
| 8.2. Comunidad <b>de Atocha</b>   |                             |                                                                                                      |                        | 1. San Vicente    | 6. Chorro           |  |
|                                   |                             |                                                                                                      |                        | 2. Vetillas       | 7. Villa Copacabana |  |
|                                   |                             |                                                                                                      |                        | 3. Tres Palcas    | 8.Escoriani         |  |
|                                   |                             |                                                                                                      |                        | 4. Portugaleta    | 9. Tholomayu        |  |
|                                   |                             |                                                                                                      |                        | 5. Tatasi         | 10. Flores Palca    |  |
| 8.3. Comunidades <b>Colcha K</b>  |                             |                                                                                                      |                        |                   | 1. Guadalupe        |  |
|                                   |                             |                                                                                                      |                        |                   | 2. Cieneguillas     |  |
| 9. Zona                           | __1 __2 __3 __4 __5 __6 __7 |                                                                                                      | 10. Coordenadas GPS    |                   |                     |  |

|                  |                                                                                                                                                                                                                                                                                                                                                                                                                        |                                                                                    |                                                                                                                                                                                                                                                                                                                                                                                                                                                                                                                                                                            |
|------------------|------------------------------------------------------------------------------------------------------------------------------------------------------------------------------------------------------------------------------------------------------------------------------------------------------------------------------------------------------------------------------------------------------------------------|------------------------------------------------------------------------------------|----------------------------------------------------------------------------------------------------------------------------------------------------------------------------------------------------------------------------------------------------------------------------------------------------------------------------------------------------------------------------------------------------------------------------------------------------------------------------------------------------------------------------------------------------------------------------|
| 1. Tipo de hogar | <input type="checkbox"/> Pareja, hombre y mujer (casados)<br><input type="checkbox"/> Pareja, hombre y mujer en unión libre<br><input type="checkbox"/> Hombre, divorciado, solo o viudo<br><input type="checkbox"/> Mujer, divorciada, sola o viuda<br><input type="checkbox"/> Mujer con esposo lejos del hogar<br><input type="checkbox"/> Hombre con esposa lejos del hogar<br><input type="checkbox"/> Otro _____ | 2. Tamaño del hogar<br>Anotar el número de miembros del hogar, según edades y sexo | adultos (18 a 59 años) <input type="checkbox"/> hombres <input type="checkbox"/> mujeres<br>adultos (mayores de 59 años) <input type="checkbox"/> hombres <input type="checkbox"/> mujeres<br>menores (entre 5 y 17 años) <input type="checkbox"/> hombres <input type="checkbox"/> mujeres<br>menores (menores de 5 años) <input type="checkbox"/> hombres <input type="checkbox"/> mujeres<br>empleado(a) del hogar, cama adentro <input type="checkbox"/> hombres <input type="checkbox"/> mujeres<br><div style="text-align: right;"><b>_____ total personas</b></div> |
|------------------|------------------------------------------------------------------------------------------------------------------------------------------------------------------------------------------------------------------------------------------------------------------------------------------------------------------------------------------------------------------------------------------------------------------------|------------------------------------------------------------------------------------|----------------------------------------------------------------------------------------------------------------------------------------------------------------------------------------------------------------------------------------------------------------------------------------------------------------------------------------------------------------------------------------------------------------------------------------------------------------------------------------------------------------------------------------------------------------------------|

*Me gustaría empezar anotando sus datos generales*

|                          |                                                       |
|--------------------------|-------------------------------------------------------|
| 1. Edad del entrevistado |                                                       |
| 2. Etnia                 | __Quechua    __Aymara    __Chicheño(a)    __Otro_____ |
| 3. Idioma principal      | __Español    __Quechua    __Aymara                    |

Las siguientes son preguntas generales sobre su educación:

1. ¿Sabe leer y escribir?  
Sí                      No (**saltar a pregunta 3**)

- 2. ¿Cuál fue el último curso que completó?**

Anotar el grado o nivel correspondiente (Ej. 6to primaria, 3er año Universidad)

## Primaria

Secundaria

Técnico

Universidad

Postgrado

Otro \_\_\_\_\_

- 2.2 Indique el grado o nivel correspondiente que completó

Primero

## Segundo

### Tercero

#### Cuarto

Quinto

### Concluido

- 3. En los últimos 3 años, ¿ha recibido algún tipo de capacitación técnica?**

Sí      No (saltar a la pregunta 5)

4. ¿Qué tipo de capacitación recibió?

SELECCIÓN MÚLTIPLE (TODAS LAS QUE APLIQUEN)

Temas agropecuarios

Emprendimientos desde el hogar

Agua, higiene y/o saneamiento

Otro

Preguntar en caso de que el entrevistado tenga **hijos** en edad escolar:

5. En los últimos 12 meses, ¿sus hijos hombres faltaron al colegio por alguna de las siguientes razones?

Leer las opciones al encuestado y anotar Sí o No, según corresponda. Adicionalmente, preguntar por otras razones de inasistencia escolar en la opción de Otros.

SELECCIÓN MÚLTIPLE (TODAS LAS QUE APLIQUEN)

Sí No Trabajó en labores de casa

Sí      No      Trabajó en las actividades agrícolas

     Sí          No     Tuvo que recolectar agua

       Sí             No      Tuvo que recolectar leña

     Sí          No   Lluvias, vientos, riadas, nevada u otros acontecimientos naturales

Sí    No    Falta de transporte

             

Sí   No   Otros

No aplica

Preguntar en caso de que el entrevistado tenga **hijas** en edad escolar:

**6. En los últimos 12 meses, ¿sus hijas mujeres faltaron al colegio por alguna de las siguientes razones?** Leer las opciones al encuestado y seleccionar SI o No, según corresponda. Adicionalmente, preguntar por otras razones de inasistencia escolar en la opción de Otros. SELECCIÓN MÚLTIPLE (TODAS LAS QUE APLIQUEN)

- ☐ Sí ☐ No Trabajó en labores de casa  
☐ Sí ☐ No Trabajó en las actividades agrícolas  
☐ Sí ☐ No Trabajó en las actividades de ganadería  
☐ Sí ☐ No Tuvo que recolectar agua  
☐ Sí ☐ No Tuvo que recolectar leña  
☐ Sí ☐ No Tuvo su menstruación  
☐ Sí ☐ No Embarazo adolescente  
☐ Sí ☐ No Lluvias, vientos, riadas, nevada u otros acontecimientos naturales  
☐ Sí ☐ No Falta de transporte  
☐ Sí ☐ No Otros \_\_\_\_\_  
☐ No aplica

### SECCIÓN 3. EMPLEO, INGRESOS Y BIENES MATERIALES

*A continuación, me gustaría preguntarle sobre su principal actividad, fuentes de ingreso y bienes materiales del hogar.*

**1. ¿Cuáles fueron las 3 principales actividades/ocupaciones en las que usó SU tiempo en los últimos 12 meses, por orden de importancia?**

El encuestador debe anotar en la columna de SELECCIÓN las 3 actividades que mencione el encuestado. En la columna RANKING debe anotar el orden de importancia de las actividades mencionadas, siendo 1 la más importante.

SELECCIÓN MÚLTIPLE (LAS 3 ACTIVIDADES QUE SE SEÑALE)

| ACTIVIDAD                                                                  | SELECCIÓN | RANKING |
|----------------------------------------------------------------------------|-----------|---------|
| Trabajo agrícola                                                           |           |         |
| Minería metálica (metales y minerales)                                     |           |         |
| Minería no metálica (explotación de áridos y agregados como arena y grava) |           |         |
| Comercio                                                                   |           |         |
| Venta de productos agrícolas                                               |           |         |
| Elaboración de productos alimenticios para venta                           |           |         |
| Transporte                                                                 |           |         |
| Construcción                                                               |           |         |
| Profesor(a)                                                                |           |         |
| Servidor(a) público                                                        |           |         |
| Trabajo del hogar (ama de casa)                                            |           |         |
| Artesanías/manualidades                                                    |           |         |
| Turismo                                                                    |           |         |
| Otro _____                                                                 |           |         |

**2. ¿Cuáles fueron las 3 principales fuentes de ingreso del HOGAR en los últimos 12 meses, por orden de importancia?**

El encuestador debe anotar, en la columna de SELECCIÓN, las 3 actividades generadoras de ingresos que mencione el encuestado. En la columna RANKING debe anotar el orden de importancia de las actividades mencionadas, siendo 1 la más importante.

SELECCIÓN MÚLTIPLE (TODAS LAS QUE APLIQUEN)

| ACTIVIDAD                                                                   | SELECCIÓN | RANKING |
|-----------------------------------------------------------------------------|-----------|---------|
| TRABAJO REMUNERADO POR PRESTACIÓN DE SERVICIOS                              |           |         |
| Trabajo asalariado del/de la entrevistado(a)                                |           |         |
| Trabajo por jornales del/de la entrevistado(a)                              |           |         |
| VENTA DE PRODUCTOS AGROPECUARIOS EN GRAN ESCALA                             |           |         |
| Negocio de venta abarrotes u otro tipo de mercadería                        |           |         |
| VENTA DE PRODUCTOS AGROPECUARIOS EN PEQUEÑA ESCALA                          |           |         |
| Venta de productos agrícolas                                                |           |         |
| Venta de ganado en pie y/u otros animales de granja                         |           |         |
| Venta de productos derivados de animales (carne, queso, huevos, miel, etc.) |           |         |
| VENTA DE PRODUCTOS ELABORADOS EN EL HOGAR                                   |           |         |
| Venta de productos alimenticios hechos en el hogar                          |           |         |
| Venta de artesanías/manualidades                                            |           |         |
| TRABAJO EN MINERÍA METÁLICA                                                 |           |         |
| Extracción independiente y venta de metales/minerales                       |           |         |
| Trabajo asalariado en empresa minera                                        |           |         |
| Ganancias repartidas en cooperativa minera                                  |           |         |
| TRABAJO EN MINERÍA NO METÁLICA                                              |           |         |
| Explotación de áridos y agregados (arena, grava) con empresa                |           |         |
| Explotación de áridos y agregados (arena, grava) de manera independiente    |           |         |
| Explotación de yeso, cuarzo, sedimentos, piedra laja, rocas)                |           |         |
| TRANSPORTE                                                                  |           |         |
| Transporte de personas                                                      |           |         |
| Transporte de minerales                                                     |           |         |
| INGRESOS NO ASOCIADOS A FUENTES DE TRABAJO                                  |           |         |
| Remesas en efectivo                                                         |           |         |
| Pensiones gobierno                                                          |           |         |
| Rentas/alquileres                                                           |           |         |
| Bonos de gobierno                                                           |           |         |
| OTROS _____                                                                 |           |         |
| No tiene ingresos propios (Trabajo no remunerado en el hogar)               |           |         |

**3. ¿Cuál de las siguientes frases describe mejor la situación de los ingresos totales en su hogar, para los últimos 12 meses?**

SELECCIONE UNA OPCIÓN

- ☐ Les alcanza bien y pueden ahorrar  
☐ Les alcanza justo sin grandes dificultades  
☐ No les alcanza y tienen algunas dificultades

**4. ¿Cuenta su hogar con los siguientes bienes o servicios?**

MARCAR LOS BIENES Y SERVICIOS QUE EL HOGAR POSEA

| Bienes/Servicios                                     | Sí |
|------------------------------------------------------|----|
| <b>Bienes domésticos</b>                             |    |
| 1. Cocina (a gas, eléctrica, etc.)                   |    |
| 2. Refrigerador/freezer congeladora                  |    |
| 3. Horno microondas                                  |    |
| 4. Radio o equipo de música                          |    |
| 5. Televisión                                        |    |
| 6. Computadora (laptop, Tablet, PC, etc.)            |    |
| 7. Lavadora                                          |    |
| 8. Teléfono fijo                                     |    |
| 9. Teléfono celular                                  |    |
| 10. Internet en el hogar                             |    |
| 11. Cámara fotográfica                               |    |
| 12. Bomba eléctrica de agua                          |    |
| 13. Calefón de agua                                  |    |
| 14. Filtro de agua de cerámica, barro, plástico      |    |
| 15. Filtro de agua instalado al grifo                |    |
| 16. Ventilador                                       |    |
| 17. Licuadora                                        |    |
| 18. Mesa                                             |    |
| 19. Sillas                                           |    |
| 20. Sofá                                             |    |
| 21. Cama                                             |    |
| 22. Roperio                                          |    |
| 23. Vitrina/cómoda de cocina                         |    |
| 24. Motocicleta                                      |    |
| 25. Automóvil                                        |    |
| 26. Camión                                           |    |
| 27. Bicicleta                                        |    |
| 28. Terreno (uso residencial/ comercial/ productivo) |    |
| 29. Vivienda                                         |    |

**SECCIÓN 4. CARACTERÍSTICAS GENERALES DEL HOGAR**

*En esta sección le haré preguntas sobre el hogar en general.*

**1. ¿Hace cuánto tiempo que su familia vive en esta comunidad?**

SELECCIONE UNA OPCIÓN

- ☐ años  
☐ meses  
☐ toda su vida (saltar a la pregunta 4)

**2. ¿Dónde vivían anteriormente usted y su familia?** \_\_\_\_\_

**3. ¿Por qué se trasladaron?**

SELECCIÓN MÚLTIPLE (TODAS LAS QUE APLIQUEN)

- ☐ Falta trabajo en lugar de origen  
☐ Falta escuela/centro educativo en lugar de origen  
☐ Matrimonio  
☐ Otras razones familiares  
☐ Mejor acceso a vivienda  
☐ Mejor acceso a agua  
☐ Falta de tierra/parcelas en el lugar de origen  
☐ Riesgos o desastres naturales (sequías, inundaciones, etc.) en el lugar de origen  
☐ Otro \_\_\_\_\_

**4. En los últimos 12 meses, ¿Usted o alguien de su familia han tenido que viajar temporadas largas (más de 1 mes) para buscar trabajo?**

- ☐ Sí ☐ No (saltar a la Sección 5)

**5. ¿Quién?**

SELECCIÓN MÚLTIPLE (TODAS LAS QUE APLIQUEN)

- ☐ Entrevistado(a)  
☐ Esposo(a)  
☐ Ambos  
☐ Padres  
☐ Hijos(as)  
☐ Otro \_\_\_\_\_

**6. ¿Por qué salieron en busca de trabajo?** Aplicar hasta dos opciones señaladas en la pregunta 5

SELECCIÓN MÚLTIPLE (TODAS LAS QUE APLIQUEN)

- ☐ Falta trabajo en lugar de origen  
☐ Baja producción agrícola  
☐ Pérdida de cultivos agrícolas  
☐ Desastres naturales afectaron producción cultivos  
☐ Desastres naturales afectaron ganado/animales de corral  
☐ Ingresos insuficientes  
☐ Otro \_\_\_\_\_

## SECCIÓN 5. CARACTERÍSTICAS DE LA VIVIENDA

*Ahora, me gustaría conocer las características de su vivienda.*

OBSERVAR NO PREGUNTAR:

### 1. La vivienda es...

SELECCIONE UNA OPCIÓN

- ☐ Casa
- ☐ Choza
- ☐ Departamento
- ☐ Cuarto(s) o habitación(es) suelta(s)
- ☐ Vivienda improvisada o vivienda móvil

### 2. La casa es...

SELECCIONE UNA OPCIÓN

- ☐ Propia (totalmente pagada)
- ☐ Propia (la están pagando)
- ☐ Propia (heredada)
- ☐ Alquilada (**saltar a la pregunta 4**)
- ☐ Anticrético (**saltar a la pregunta 4**)
- ☐ Prestada (de un familiar, amigo) (**saltar a la pregunta 4**)
- ☐ Otra \_\_\_\_\_

### 3. ¿A nombre de quién está la casa?

SELECCIONE UNA OPCIÓN

- ☐ Entrevistado(a)
- ☐ Esposo(a)
- ☐ Ambos
- ☐ Padres o parientes
- ☐ Hijos(as)
- ☐ Otro \_\_\_\_\_

TRATAR DE OBSERVAR PARA NO PREGUNTAR:

### 4. ¿Cuál es el material más usado en las paredes de la casa?

SELECCIONE UNA OPCIÓN

- ☐ Ladrillo/Concreto/hormigón
- ☐ Adobe
- ☐ Piedra
- ☐ Madera
- ☐ Troncos/tablas
- ☐ Otro \_\_\_\_\_

TRATAR DE OBSERVAR PARA NO PREGUNTAR:

### 5. ¿Las paredes interiores de esta vivienda tienen revoque?

- ☐ Sí
- ☐ No

TRATAR DE OBSERVAR PARA NO PREGUNTAR:

### 6. ¿Cuál es el material más usado en el techo de la casa?

SELECCIONE UNA OPCIÓN

- ☐ Teja
- ☐ Madera
- ☐ Calamina metálica/plancha metálica
- ☐ Calamina plástica
- ☐ Losa de hormigón armado
- ☐ Paja/material vegetal/palos
- ☐ Otro \_\_\_\_\_

### 7. ¿Cuántos cuartos o habitaciones de esta vivienda ocupa su hogar para dormir, sin contar baño, cocina, lavandería, garaje, depósito o negocio?

\_\_\_\_\_ dormitorios

OBSERVAR NO PREGUNTAR:

### 8. La vivienda tiene:

- Ventanas con vidrios ☐ Sí ☐ No
- Ventanas con cortinas ☐ Sí ☐ No

### 9. ¿Tienen otra casa aparte de ésta?

- ☐ Sí, en la misma comunidad
- ☐ Sí, en otra comunidad/ciudad ¿Dónde? \_\_\_\_\_
- ☐ No

## SECCIÓN 6. SERVICIOS BÁSICOS EN EL HOGAR

*A continuación, me gustaría hacerle unas preguntas sobre los diferentes tipos de servicios básicos que tiene en el hogar.*

### 6.1 Electricidad y combustible de cocina

*Empezare preguntándole sobre el tipo de energía y combustible que utiliza el hogar.*

#### 1. ¿Tiene energía eléctrica para alumbrar su vivienda?

☐ Sí ☐ No (**saltar a la pregunta 3**)

#### 2. ¿Quién paga (pone el dinero) habitualmente por la electricidad/iluminación de su hogar?

SELECCIONE UNA OPCIÓN

- ☐ Entrevistado(a)
- ☐ Esposo(a)
- ☐ Ambos
- ☐ Padres o parientes
- ☐ Hijos(as)
- ☐ Otro \_\_\_\_\_

### 3. ¿Cuál es el principal combustible para cocinar en el hogar?

SELECCIONE UNA OPCIÓN

- ☐ Leña
- ☐ Guano/bosta/taquia
- ☐ Gas licuado (garrafa)
- ☐ Gas natural (cañería)
- ☐ Kerosene
- ☐ Electricidad (**saltar a la subsección 6.2**)
- ☐ No utiliza (no cocina)
- ☐ Otro \_\_\_\_\_

Hacer esta pregunta sólo si el combustible para cocinar es diferente a “electricidad”:

### 4. ¿Quién paga (pone el dinero) habitualmente el combustible para cocinar en el hogar?

SELECCIONE UNA OPCIÓN

- ☐ Entrevistado(a)
- ☐ Esposo(a)
- ☐ Ambos
- ☐ Padres o parientes
- ☐ Hijos(as)
- ☐ Otro \_\_\_\_\_

## 6.2 Agua

*Continuaré con preguntas sobre varios aspectos de los servicios de agua en el hogar.*

### Subsección A: FUENTES DE AGUA PARA USO EN EL HOGAR

Esta sección es **para identificar la fuente primaria de agua del hogar, si éste usa distintas fuentes para consumo doméstico** (ej.: agua embotellada para beber/cocinar y agua superficial para otros usos en el hogar [lavado de ropa, aseo personal, etc.]

### 1. ¿Cuál es la fuente principal de agua que utiliza en el hogar?

SELECCIONE UNA OPCIÓN (VER ESQUEMA DE APOYO)

- ☐ Cañería en la vivienda (**saltar a la subsección B1**)
- ☐ Cañería dentro del terreno/patio (**saltar a la subsección B1**)
- ☐ Grifo público (**saltar a la subsección C1**)
- ☐ Pozo perforado o entubado (**saltar a la subsección C1**)
- ☐ Pozo cubierto (**saltar a la subsección C1**)
- ☐ Pozo al aire libre/no protegida (**saltar a la subsección C1**)
- ☐ Vertiente/Vena u ojo de agua/protegida (**saltar a la subsección C1**)
- ☐ Vertiente/Vena u ojo de agua/al aire libre - no protegida (**saltar a la subsección C1**)
- ☐ Recolección de agua de lluvia (**saltar a la subsección C1**)
- ☐ Agua superficial (río/lago/represa/arroyo/acequia) (**saltar a la subsección C1**)
- ☐ Camiones aguateros (**saltar a la subsección C1**)
- ☐ Agua embotellada (**Ir a sección C1**)
- ☐ Otro (Explique): \_\_\_\_\_ (**Ir a sección C1**)

### Subsección B1: HOGARES CON CAÑERÍA EN VIVIENDA O PATIO/TERRENO

El objetivo es identificar la continuidad del servicio (intermitencia).

**Uso doméstico\*** implica todos los usos dentro del hogar (lavar, aseo personal, regar jardín etc.) –

*Permítame hacerle unas preguntas sobre su conexión de red*

### 2. ¿Para qué utiliza el agua de esta fuente?

SELECCIÓN MÚLTIPLE

- ☐ Beber
- ☐ Cocinar
- ☐ Lavar ropa
- ☐ Jalarle al baño
- ☐ Bañarse
- ☐ Lavar la casa
- ☐ Darle de comer a los animales
- ☐ Regar el jardín
- ☐ Otro \_\_\_\_\_

### 3. ¿Sabe cuánta agua para uso doméstico utiliza el hogar al mes?

- ☐ Si
- ☐ No Sabe (**Saltar a pregunta 4**)

### 3.1. ¿Cuántos M<sup>3</sup> de agua utiliza el hogar al mes para uso doméstico?

El encuestador puede sugerir al/la entrevistado/a que se fije en su última boleta de pago del servicio

SELECCIÓN UNA OPCIÓN

- ☐ m<sup>3</sup>/mes (para conexiones a red)

### 4. ¿Con qué frecuencia recibe agua?

SELECCIONE UNA OPCIÓN

- ☐ diariamente
- ☐ semanalmente (**saltar a la pregunta 6**)
- ☐ No sabe (**saltar a la pregunta 7**)

### 5. Cuántas horas al día, en promedio, ¿tiene agua disponible en el hogar?

SELECCIONE UNA OPCIÓN:

- ☐ 24 horas al día
- ☐ 18 a 23 horas al día
- ☐ 12 a 17 horas al día
- ☐ 6-11 horas al día
- ☐ menos de 6 horas al día
- ☐ No sabe

6. Sabe cuántas veces por semana en promedio, tiene agua disponible en el hogar  
 \_\_\_ Si  
 \_\_\_ No (Saltar a pregunta 7)

6.1. ¿Cuántas **veces por semana, en promedio**, ¿tiene agua disponible en el hogar?

\_\_\_ veces por semana  
 \_\_\_ horas día

7. ¿Qué tipo de problemas enfrentan relacionados con **esta fuente**, ¿Cuál de éstos considera usted como **el más importante**?

**No leer la lista**, escuchar la respuesta del entrevistado y seleccionar las opciones que correspondan.

SELECCIÓN MÚLTIPLE (TODAS LAS QUE APLIQUEN) y MARCAR LA MÁS IMPORTANTE

| PROBLEMAS                                                                                                                 | SELECCION | MÁS IMPORTANTE |
|---------------------------------------------------------------------------------------------------------------------------|-----------|----------------|
| Las instalaciones se averían frecuentemente                                                                               |           |                |
| Suministro poco fiable                                                                                                    |           |                |
| Abastecimiento insuficiente                                                                                               |           |                |
| El agua tiene mal sabor, color u olor (ej. agua salada)                                                                   |           |                |
| Fuentes de agua contaminadas por minería (ej. agua picante/copajira)                                                      |           |                |
| Fuentes de agua contaminadas por herbicidas/pesticidas/fertilizantes                                                      |           |                |
| Fuentes de agua contaminadas biológicamente (ej. gérmenes, bacterias provenientes de alcantarillado, desagües y/o basura) |           |                |
| Escasez de agua por temporadas                                                                                            |           |                |
| Muy caro para pagar                                                                                                       |           |                |
| Ningún problema                                                                                                           |           |                |

SALTAR A PG 16

**APLICAR SI FUENTE NO ES CAÑERÍA**

**Subsección C1: Recolección y cantidad de agua de DIFERENTES FUENTES O FUENTE ÚNICA**

Las preguntas en esta sección están dirigidas a los hogares que **NO USAN CAÑERÍA**. El objetivo es identificar las condiciones y roles de género en la recolección de agua. Además de identificar los principales problemas que enfrenta el hogar para cada uso doméstico dentro del hogar.-

*Permítame hacerle unas preguntas sobre sus distintas fuentes de agua para diferentes usos en el hogar.*

8. ¿Para qué utiliza el agua de esta fuente?

SELECCIÓN MÚLTIPLE

\_\_\_ Beber  
 \_\_\_ Cocinar  
 \_\_\_ Lavar ropa  
 \_\_\_ Jalarle al baño  
 \_\_\_ Bañarse  
 \_\_\_ Lavar la casa  
 \_\_\_ Darle de comer a los animales  
 \_\_\_ Regar el jardín  
 \_\_\_ Otro (Explique): \_\_\_\_\_

9. ¿Sabe cuánto **tiempo** tarda aproximadamente en **llegar a ESTA fuente para recolectar agua y retornar a su hogar**?

SELECCIONE UNA OPCIÓN

\_\_\_ Si  
 \_\_\_ No (Saltar a pregunta 10)

- 9.1. ¿Cuánto **tiempo** tarda aproximadamente en **llegar a ESTA fuente para recolectar agua y retornar a su hogar**?

Anotar el número de minutos o convertir a minutos en caso de que mencionen horas

Número de minutos \_\_\_\_\_

10. ¿Con qué **frecuencia recolecta agua** de **ESTA** fuente?

SELECCIONE UNA OPCIÓN

\_\_\_ veces por semana  
 \_\_\_ veces por día  
 \_\_\_ No sabe

11. ¿Quién se **encarga de recoger agua, de ESTA fuente, principalmente** en el hogar?

Debe asegurarse de que el entrevistado mencione a la persona que más frecuentemente recolecta agua en el hogar

SELECCIONE UNA OPCIÓN:

\_\_\_ Mujer adulta (18 a 59 años)  
 \_\_\_ Hombre adulto (18 a 59 años)  
 \_\_\_ Niña (entre 5 y 17 años)  
 \_\_\_ Niño (entre 5 y 17 años)  
 \_\_\_ El hogar en su conjunto  
 \_\_\_ Otro (Explique): \_\_\_\_\_

**12. ¿Qué medio de transporte usa, la mayor parte del tiempo, para recolectar agua de ESTA fuente?**

Si la persona menciona que no usa medio de transporte el encuestador debe preguntar si ésta camina y marcar lo que corresponda

SELECCIONE UNA OPCIÓN

- ☐ Caminando  
☐ Animal de carga (ej. burro)  
☐ Bicicleta  
☐ Motocicleta  
☐ Otro (Explique): \_\_\_\_\_  
☐ No sabe

**13. Si la persona entrevistada es una de las que recolecta agua, ¿en qué usaría ese tiempo que le toma recoger agua, si no tuviera que hacerlo?**

SELECCIONE UNA OPCIÓN

- ☐ Otras tareas del hogar  
☐ Cuidado personal  
☐ Trabajar  
☐ Descansar  
☐ Estudiar  
☐ Otro \_\_\_\_\_ ☐ N/A

**14. ¿Cuánta agua de ESTA fuente utiliza el hogar en un día?**

Anotar **sólo una opción** de acuerdo con el tipo de contenedor y su capacidad en litros

SELECCIONE UNA OPCIÓN:

- ☐ Número de bidones/botellones de 20 litros  
☐ Número de barriles de \_\_\_\_\_ litros.  
☐ Otro (Explique): \_\_\_\_\_  
☐ No sabe

**15. ¿Qué tipo de problemas enfrentan relacionados con ESTA fuente, ¿Cuál de éstos considera usted como el más importante?**

**No leer la lista**, escuchar la respuesta del entrevistado y seleccionar las opciones que correspondan.

SELECCIÓN MÚLTIPLE (TODAS LAS QUE APLIQUEN) y MARCAR LA MÁS IMPORTANTE

| PROBLEMAS                                               | SELECCION | MÁS IMPORTANTE |
|---------------------------------------------------------|-----------|----------------|
| Las instalaciones se averían frecuentemente             |           |                |
| Suministro poco fiable                                  |           |                |
| Abastecimiento insuficiente                             |           |                |
| El agua tiene mal sabor, color u olor (ej. agua salada) |           |                |

| PROBLEMAS                                                                                                                 | SELECCION | MÁS IMPORTANTE |
|---------------------------------------------------------------------------------------------------------------------------|-----------|----------------|
| Fuentes de agua contaminadas por minería (ej. agua picante/copajira)                                                      |           |                |
| Fuentes de agua contaminadas por herbicidas/pesticidas/fertilizantes                                                      |           |                |
| Fuentes de agua contaminadas biológicamente (ej. gérmenes, bacterias provenientes de alcantarillado, desagües y/o basura) |           |                |
| Largas distancias hacia las fuentes de agua                                                                               |           |                |
| Escasez de agua por temporadas                                                                                            |           |                |
| Muy caro para pagar                                                                                                       |           |                |
| Ningún problema                                                                                                           |           |                |

**16. ¿El hogar utiliza una fuente secundaria?**

SELECCIONE UNA OPCIÓN:

- ☐ Si  
☐ No (**salta a la subsección D**)

**17. ¿Cuál es su fuente secundaria?**

SELECCIONE UNA OPCIÓN (VER ESQUEMA DE APOYO)

- ☐ Cañería en la vivienda (**salta a la subsección B2**)  
☐ Cañería dentro del terreno/patio (**salta a la subsección B2**)  
☐ Grifo público (**salta a la subsección C2**)  
☐ Pozo perforado o entubado (**salta a la subsección C2**)  
☐ Pozo cubierto (**salta a la subsección C2**)  
☐ Pozo al aire libre/no protegida (**salta a la subsección C2**)  
☐ Vertiente/Vena u ojo de agua/protegida (**salta a la subsección C2**)  
☐ Vertiente/Vena u ojo de agua/al aire libre - no protegida (**salta a la subsección C2**)  
☐ Recolección de agua de lluvia (**salta a la subsección C2**)  
☐ Agua superficial (río/lago/represa/arroyo/acequia) (**salta a la subsección C2**)  
☐ Camiones aguateros (**salta a la subsección C2**)  
☐ Agua embotellada (**Ir a sección C2**)  
☐ Otro (Explique): \_\_\_\_\_ (**Ir a sección C2**)

**Subsección B2: HOGARES CON CAÑERÍA EN VIVIENDA O PATIO/TERRENO**

El objetivo es identificar la continuidad del servicio (intermitencia).

**Uso doméstico\*** implica todos los usos dentro del hogar (lavar, aseo personal, regar jardín etc.) –

*Permítame hacerle unas preguntas sobre su conexión de red*

**18. ¿Para qué utiliza el agua de esta fuente?**

- ☐ Beber  
☐ Cocinar  
☐ Lavar ropa

- ☐ Jalarle al baño
- ☐ Bañarse
- ☐ Lavar la casa
- ☐ Darle de comer a los animales
- ☐ Regar el jardín
- ☐ Otro \_\_\_\_\_

19. ¿Sabe cuánta agua para uso doméstico utiliza el hogar al mes?

- ☐ Si
- ☐ No Sabe (Saltar a pregunta 20)

19.1. ¿Cuántos M<sup>3</sup> de agua utiliza el hogar al mes para uso doméstico?

El encuestador puede sugerir al/la entrevistado/a que se fije en su última boleta de pago del servicio

SELECCIÓN UNA OPCIÓN

- ☐ m3/mes (para conexiones a red)

20. ¿Con qué frecuencia recibe agua?

SELECCIONE UNA OPCIÓN

- ☐ diariamente
- ☐ semanalmente (saltar a la pregunta 22)
- ☐ No sabe (saltar a la pregunta 23)

21. Cuántas horas al día, en promedio, ¿tiene agua disponible en el hogar?

SELECCIONE UNA OPCIÓN:

- ☐ 24 horas al día
- ☐ 18 a 23 horas al día
- ☐ 12 a 17 horas al día
- ☐ 6-11 horas al día
- ☐ menos de 6 horas al día
- ☐ No sabe

22. Sabe cuántas veces por semana en promedio, tiene agua disponible en el hogar

- ☐ Si
- ☐ No (Saltar a pregunta 23)

22.1. ¿Cuántas veces por semana, en promedio, ¿tiene agua disponible en el hogar?

- ☐ veces por semana
- ☐ horas día

23. ¿Qué tipo de problemas enfrentan relacionados con esta fuente, ¿Cuál de éstos considera usted como el más importante?

No leer la lista, escuchar la respuesta del entrevistado y seleccionar las opciones que correspondan.

SELECCIÓN MÚLTIPLE (TODAS LAS QUE APLIQUEN) y MARCAR LA MÁS IMPORTANTE

| PROBLEMAS                                                                                                                 | SELECCION | MÁS IMPORTANTE |
|---------------------------------------------------------------------------------------------------------------------------|-----------|----------------|
| Las instalaciones se averían frecuentemente                                                                               |           |                |
| Suministro poco fiable                                                                                                    |           |                |
| Abastecimiento insuficiente                                                                                               |           |                |
| El agua tiene mal sabor, color u olor (ej. agua salada)                                                                   |           |                |
| Fuentes de agua contaminadas por minería (ej. agua picante/copajira)                                                      |           |                |
| Fuentes de agua contaminadas por herbicidas/pesticidas/fertilizantes                                                      |           |                |
| Fuentes de agua contaminadas biológicamente (ej. gérmenes, bacterias provenientes de alcantarillado, desagües y/o basura) |           |                |
| Escasez de agua por temporadas                                                                                            |           |                |
| Muy caro para pagar                                                                                                       |           |                |
| Ningún problema                                                                                                           |           |                |

SALTAR A SECCIÓN D

APLICAR SI FUENTE NO ES CAÑERÍA

#### Subsección C2 Recolección y cantidad de agua de DIFERENTES FUENTES O FUENTE ÚNICA

Las preguntas en esta sección están dirigidas a los hogares que **NO USAN CAÑERÍA**. El objetivo es identificar las condiciones y roles de género en la recolección de agua. Además de identificar los principales problemas que enfrenta el hogar para cada uso doméstico dentro del hogar.-

*Permítame hacerle unas preguntas sobre sus distintas fuentes de agua para diferentes usos en el hogar.*

24. ¿Para qué utiliza el agua de esta fuente?

- ☐ Beber
- ☐ Cocinar
- ☐ Lavar ropa
- ☐ Jalarle al baño
- ☐ Bañarse
- ☐ Lavar la casa
- ☐ Darle de comer a los animales
- ☐ Regar el jardín

☐ Otro (Explique): \_\_\_\_\_

**25. ¿Sabe cuánto tiempo tarda aproximadamente en llegar a ESTA fuente para recolectar agua y retornar a su hogar?**

SELECCIONE UNA OPCIÓN

- ☐ Si  
☐ No (Saltar a pregunta 26)

**25.1. ¿Cuánto tiempo tarda aproximadamente en llegar a ESTA fuente para recolectar agua y retornar a su hogar?**

Anotar el número de minutos o convertir a minutos en caso de que mencionen horas

Número de minutos \_\_\_\_\_

**26. ¿Con qué frecuencia recolecta agua de ESTA fuente?**

SELECCIONE UNA OPCIÓN

- ☐ veces por semana  
☐ veces por día  
☐ No sabe

**27. ¿Quién se encarga de recoger agua, de ESTA fuente, principalmente en el hogar?**

Debe asegurarse de que el entrevistado mencione a la persona que más frecuentemente recolecta agua en el hogar

SELECCIONE UNA OPCIÓN:

- ☐ Mujer adulta (18 a 59 años)  
☐ Hombre adulto (18 a 59 años)  
☐ Niña (entre 5 y 17 años)  
☐ Niño (entre 5 y 17 años)  
☐ El hogar en su conjunto  
☐ Otro (Explique): \_\_\_\_\_

**28. ¿Qué medio de transporte usa, la mayor parte del tiempo, para recolectar agua de ESTA fuente?**

Si la persona menciona que no usa medio de transporte el encuestador debe preguntar si ésta camina y marcar lo que corresponda

SELECCIONE UNA OPCIÓN

- ☐ Caminando  
☐ Animal de carga (ej. burro)  
☐ Bicicleta  
☐ Motocicleta  
☐ Otro (Explique): \_\_\_\_\_  
☐ No sabe

**29. Si la persona entrevistada es una de las que recolecta agua, ¿en qué usaría ese tiempo que le toma recoger agua, si no tuviera que hacerlo?**

SELECCIONE UNA OPCIÓN

- ☐ Otras tareas del hogar  
☐ Cuidado personal  
☐ Trabajar  
☐ Descansar  
☐ Estudiar  
☐ Otro \_\_\_\_\_ ☐ N/A

**30. ¿Cuánta agua de ESTA fuente utiliza el hogar en un día?**

Anotar **sólo una opción** de acuerdo con el tipo de contenedor y su capacidad en litros

SELECCIONE UNA OPCIÓN:

- ☐ Número de bidones/botellones de 20 litros  
☐ Número de barriles de \_\_\_\_\_ litros.  
☐ Otro (Explique): \_\_\_\_\_  
☐ No sabe

**31. ¿Qué tipo de problemas enfrentan relacionados con ESTA fuente, ¿Cuál de éstos considera usted como el más importante?**

**No leer la lista**, escuchar la respuesta del entrevistado y seleccionar las opciones que correspondan.

SELECCIÓN MÚLTIPLE (TODAS LAS QUE APLIQUEN) y MARCAR LA MÁS IMPORTANTE

| PROBLEMAS                                                                                                                 | SELECCION | MÁS IMPORTANTE |
|---------------------------------------------------------------------------------------------------------------------------|-----------|----------------|
| Las instalaciones se averían frecuentemente                                                                               |           |                |
| Suministro poco fiable                                                                                                    |           |                |
| Abastecimiento insuficiente                                                                                               |           |                |
| El agua tiene mal sabor, color u olor (ej. agua salada)                                                                   |           |                |
| Fuentes de agua contaminadas por minería (ej. agua picante/copajira)                                                      |           |                |
| Fuentes de agua contaminadas por herbicidas/pesticidas/fertilizantes                                                      |           |                |
| Fuentes de agua contaminadas biológicamente (ej. gérmenes, bacterias provenientes de alcantarillado, desagües y/o basura) |           |                |
| Largas distancias hacia las fuentes de agua                                                                               |           |                |
| Escasez de agua por temporadas                                                                                            |           |                |
| Muy caro para pagar                                                                                                       |           |                |
| Ningún problema                                                                                                           |           |                |

**APLICAR LA SIGUIENTE SECCIÓN A TODOS LOS CASOS**

**Subsección D: Almacenamiento, tratamiento y fuentes alternativas de agua.**

Esta sección se aplica a **TODO LOS CASOS** (sin importar el tipo de fuente primaria de agua para consumo doméstico). El objetivo es identificar cómo almacenan agua (dentro y fuera del hogar) y si se aplica algún tipo de tratamiento antes de su consumo. Además de identificar si el hogar hace uso de fuentes alternativas de agua cuando su principal fuente no está disponible u ocurre una falla en el suministro.

*Ahora me gustaría hacerle unas preguntas sobre cómo almacena agua en su hogar y si tiene alguna fuente secundaria o alternativa de agua para consumo en el hogar.*

**32. ¿Cómo almacena el agua PARA BEBER Y COCINAR dentro de su hogar? ¿Me podría mostrar?**

Observar y anotar las características del contenedor. Si el entrevistado no quiere mostrar el contenedor, marcar “No se pudo observar”

SELECCIONE UNA OPCIÓN

- ☐ Contenedor de plástico con tapa
- ☐ Contenedor de metal con tapa
- ☐ Contenedor de plástico sin tapa
- ☐ Contenedor de metal sin tapa
- ☐ Otro \_\_\_\_\_
- ☐ No se pudo observar
- ☐ No almacena agua en el hogar

**33. ¿Hacen algún tipo de tratamiento al agua antes de consumirla?**

SELECCIÓN MÚLTIPLE

- ☐ Hervir (saltar a la pregunta 35)
- ☐ Filtrar (saltar a la pregunta 35)
- ☐ Clorar (saltar a la pregunta 35)
- ☐ Desinfección solar (SODIS) (saltar a la pregunta 35)
- ☐ Dejar reposar para que se asiente (saltar a la pregunta 35)
- ☐ Otro \_\_\_\_\_ (saltar a la pregunta 35)
- ☐ No sabe (saltar a la pregunta 35)
- ☐ Ningún tratamiento

**34. ¿Por qué no realiza ningún tipo de tratamiento al agua?**

- ☐ No sabe qué tipos de tratamiento existen
- ☐ No le alcanza el tiempo
- ☐ Cree que no es necesario
- ☐ Cree que el agua es de buena calidad
- ☐ Otro \_\_\_\_\_
- ☐ No sabe

**35. En los últimos 12 meses, ¿el hogar tuvo SIEMPRE suficiente agua disponible de su(s) fuente(s) primaria(s) cuando se necesitaba para uso doméstico/en el hogar?**

SELECCIONE UNA OPCIÓN

- ☐ Sí (saltar a la pregunta 38)
- ☐ No
- ☐ No sabe (saltar a la pregunta 38)

**36. ¿Durante qué meses la disponibilidad de agua de la fuente primaria no fue suficiente para uso doméstico?**

El encuestador debe hacer énfasis en **preguntar si el agua no fue suficiente para USO DOMESTICO (beber, cocinar, lavar, aseo personal, etc.)**, puede que en algunos casos el hogar comparta las fuentes también para riego. Por eso la necesidad de que la pregunta sea clara.

**Marque los meses en los que el agua no fue suficiente para consumo domestico**

| OCT | NOV | DIC | ENE | FEB | MAR | ABR | MAY | JUN | JUL | AGO | SEP |
|-----|-----|-----|-----|-----|-----|-----|-----|-----|-----|-----|-----|
|     |     |     |     |     |     |     |     |     |     |     |     |

**37. ¿La falta de agua siempre ocurre en los mismos meses o ha cambiado en los últimos 5 años?**

SELECCIONE UNA OPCIÓN

- ☐ Sí, siempre ocurre en los mismos meses
- ☐ No, la disponibilidad de agua ha cambiado los últimos años
- ☐ No sabe

**38. ¿El hogar tiene un tanque de almacenamiento de agua?**

SELECCIONE UNA OPCIÓN

- ☐ Sí
- ☐ No (saltar a la pregunta 42)

**39. ¿Cuál es la capacidad de almacenamiento del tanque?**

SELECCIONE UNA OPCIÓN

- ☐ m<sup>3</sup>
- ☐ litros
- ☐ No sabe

**VERIFICAR EN PILOTO SI SE DEJA M3 O LITROS**

**40. ¿De dónde proviene el agua que se almacena en el tanque?**

SELECCIÓN MÚLTIPLE

- ☐ Cosecha de agua de lluvia
- ☐ Carro aguatero
- ☐ Otro (Explique) \_\_\_\_\_

**41.** ¿Sabe cuántas veces **tuvo que rellenar el tanque de agua en los últimos 12 meses?**

SELECCIONE UNA OPCIÓN

- ☐ Sí  
☐ No (Saltar a pregunta 42)

**41.1.** Indique el número de veces

\_\_\_ número de veces

**42.** ¿Considera que el hogar **necesita** un tanque de almacenamiento de agua?

SELECCIONE UNA OPCIÓN

- ☐ Sí  
☐ No  
☐ No sabe

**43.** ¿El **SUMINISTRO** de agua de uso doméstico en su hogar, es o no es por cañería?

- ☐ El suministro de agua ES por CAÑERÍA  
☐ El suministro de agua NO ES por CAÑERÍA (saltar a pregunta 44)

**43.1.** ¿Sabe **cuánto paga** por el agua de uso doméstico/en el hogar, **SI EL**

**SUMINISTRO ES POR CAÑERÍA?** BS/ MES

SELECCIONE UNA OPCIÓN

- ☐ Sí  
☐ No (Saltar a pregunta 45)

**43.2.** ¿**Cuánto paga (BS/MES)** por el agua de uso doméstico/en el hogar, **SI EL SUMINISTRO ES POR CAÑERÍA?**

\_\_\_Bs/mes (monto fijo mensual) (saltar a pregunta 45)

**44.** ¿Sabe **cuánto paga** por el agua de uso doméstico/en el hogar **y cuál es la forma de pago, SI EL SUMINISTRO NO ES POR CAÑERÍA?**

SELECCIONE UNA OPCIÓN

- ☐ Sí  
☐ No paga nada (Saltar a pregunta 47)  
☐ No sabe (Saltar a pregunta 45)

**44.1.** ¿**Cuánto paga** por el agua de uso doméstico/en el hogar **y cuál es la forma de pago, SI EL SUMINISTRO NO ES POR CAÑERÍA?**

- ☐ Bs/año (monto fijo anual)  
☐ Bs/ Cuando hay un desperfecto o problema  
☐ Bs/ Por contenedor

**45.** ¿**Quién paga (pone la plata)** generalmente los costos de agua?

SELECCIÓN MÚLTIPLE (TODAS LAS QUE APLIQUEN)

- ☐ Entrevistado(a)  
☐ Esposa(o)  
☐ Hijos adultos (18 años o más)

\_\_\_ Hijos adultos (18 años o más)

\_\_\_ Otro \_\_\_\_\_

\_\_\_ No sabe

**46.** ¿A **quién se realiza el pago** por los servicios de agua para consumo doméstico?

SELECCIONE UNA OPCIÓN

- ☐ Empresa municipal  
☐ Empresa privada  
☐ Juez de agua  
☐ Otro (Explique) \_\_\_\_\_

**47.** En los últimos 12 meses ¿Usó **OTRA FUENTE (secundaria)** para abastecerse de agua en el hogar **durante un corte del servicio, insuficiente agua u otro problema con su(s) fuente(s) de agua principal(es)?**

SELECCIONE UNA OPCIÓN:

- ☐ Sí  
☐ No (saltar a la pregunta 49)  
☐ No sabe (saltar a la pregunta 49)

**48.** Si respondió Sí, ¿**cuál(es) fue(ron) esta(s) fuente(s)?**

Observar de ser posible (VER ESQUEMA DE APOYO)

SELECCIÓN MÚLTIPLE (TODAS LAS QUE APLIQUEN)

- ☐ Grifo público  
☐ Pozo perforado o entubado  
☐ Pozo cubierto  
☐ Pozo al aire libre/no protegido  
☐ Vertiente/manantial/toma de agua protegida  
☐ Vertiente/manantial/toma de agua al aire libre/no protegida  
☐ Recolección de agua de lluvia  
☐ Agua superficial (río/lago/represa/arroyo/acequia)  
☐ Camiones aguateros  
☐ Agua embotellada  
☐ Otro \_\_\_\_\_

**49.** En los últimos 5 años, ¿ha sido beneficiado con algún proyecto para mejorar el abastecimiento de agua en su hogar?

- ☐ Sí  
☐ No (Saltar a pregunta 52)

**50.** ¿En qué consistió el/los proyecto(s)? (Hacer referencia a los 2 más importantes)

SELECCIÓN MÚLTIPLE (TODAS LAS QUE APLIQUEN)

- ☐ Bomba eléctrica  
☐ Excavación de estanques privados  
☐ Excavación de estanques públicos  
☐ Pozo público

- ☐ Pozo privado
- ☐ Tanque de agua
- ☐ Atajados de agua de lluvia
- ☐ Otro \_\_\_\_\_

**Aplicar pregunta 51 para las 2 opciones mencionadas por el encuestado**

**Existe una pregunta filtro, si existe un segundo proyecto se muestra la pregunta 51 nuevamente, caso contrario continúa en la pregunta 52.**

**51.** ¿Considera que el proyecto fue \_\_\_\_\_ para su familia? Duplicar en QuestionPro

SELECCIONE UNA OPCIÓN

- ☐ Muy útil
- ☐ Útil
- ☐ Poco útil

**52.** En los últimos 5 años, ¿Ha realizado algún tipo de inversión personal para mejorar la provisión de agua en su casa?

☐ Sí ☐ No **(saltar a Sección 6.3)**

**53.** ¿En qué consistió la inversión/mejora?

SELECCIÓN MÚLTIPLE (TODAS LAS QUE APLIQUEN)

- ☐ Construcción de nuevo pozo
- ☐ Instalación de bomba eléctrica
- ☐ Tanque de almacenamiento
- ☐ Reemplazo de tuberías
- ☐ Otro \_\_\_\_\_

### 6.3 Saneamiento e higiene

**SUBSECCIÓN F:** Las preguntas en esta sección están dirigidas **A TODOS LOS CASOS (HOGARES)**. El objetivo es identificar las condiciones de saneamiento e higiene que tiene el hogar.

*A continuación, le haré preguntas sobre los servicios de saneamiento y las prácticas de higiene dentro del hogar.*

**54.** ¿Tiene el hogar un baño/letrina?

SELECCIONE UNA OPCIÓN

- ☐ Si, dentro de la casa
- ☐ Si, Fuera de la casa
- ☐ No, ninguna instalación **(saltar a la pregunta 74)**

**55.** ¿Qué tipo de baño (sistema sanitario) utiliza normalmente en su hogar?

SELECCIONE UNA OPCIÓN (VER ESQUEMAS DE APOYO)

- ☐ Baño o letrina con descarga de agua
- ☐ Baño o letrina con cisterna de agua
- ☐ Baño ecológico seco con desviación de orina **(saltar a la pregunta 57)**
- ☐ Baño compostero (seco) **(saltar a la pregunta 57)**

☐ Letrina seca mejorada (con ventilación y piso) **(saltar a la pregunta 57)**

☐ Letrina seca sencilla sin piso **(saltar a la pregunta 57)**

☐ Balde o cubeta **(saltar a la pregunta 74)**

☐ Otro (Explique): \_\_\_\_\_ **(saltar a la pregunta 57)**

**56.** El “baño o letrina con descarga de agua” tiene desagüe a ...

Observar y marcar la opción que aplique (VER ESQUEMA DE APOYO)

SELECCIONE UNA OPCIÓN

- ☐ a la red de alcantarillado **(saltar a la pregunta 58)**
- ☐ a una cámara séptica
- ☐ a un pozo ciego
- ☐ a la superficie (calle, quebrada, río)
- ☐ Otro \_\_\_\_\_
- ☐ No sabe

**57.** ¿La última vez que el **baño** fue vaciado, donde se depositaron los desechos sanitarios?

SELECCIONE UNA OPCIÓN

- ☐ Recolección de lodos por compañía pública o privada
- ☐ Compostados
- ☐ Enterrados
- ☐ Quemados
- ☐ Pozo abierto/campo abierto/cuerpo de agua
- ☐ Nunca se ha dado mantenimiento
- ☐ Otro \_\_\_\_\_
- ☐ No sabe

**58.** El baño o letrina tiene:

De ser posible, observar las instalaciones y marcar todas las opciones que apliquen

SELECCIÓN MÚLTIPLE

- ☐ Iluminación adentro
- ☐ Iluminación afuera
- ☐ Cerradura por dentro
- ☐ Basurero dentro de las instalaciones
- ☐ Lavamanos
- ☐ Ninguna de los anteriores
- ☐ No se pudo observar

**59.** ¿El baño o letrina es...

SELECCIONE UNA OPCIÓN

- ☐ Usado sólo por el hogar
- ☐ Compartido con otros hogares conocidos → ¿Cuántos? \_\_\_\_\_
- ☐ Compartido con el público en general (baño o letrina público)
- ☐ No sabe

60. ¿Los miembros del hogar pueden acceder al baño/letrina a todas horas del día y noche?

SELECCIONE UNA OPCIÓN

- ☐ Sí, el baño/letrina está dentro de la vivienda (**saltar a la pregunta 63**)  
☐ No, sólo a ciertas horas en el día (el baño/letrina esta fuera de la vivienda)

61. ¿Cuánto tarda en llegar desde su casa hasta el baño/letrina? En MINUTOS  
\_\_\_\_\_ minutos

62. ¿Usted o algún otro miembro del hogar enfrenta algún riesgo cuando usa el baño/letrina?

SELECCIÓN MÚLTIPLE (TODAS LAS QUE APLIQUEN)

- ☐ No, ningún riesgo  
☐ Sí, riesgo a la salud  
☐ Sí, riesgo de acoso  
☐ Sí, otro \_\_\_\_\_  
☐ No sabe

63. ¿En los últimos 12 meses, algún evento extremo le ha impedido acceder a su baño o letrina?

- ☐ Si → Cuál (SELECCIÓN MÚLTIPLE)
- |                                         |
|-----------------------------------------|
| <input type="checkbox"/> Sequías        |
| <input type="checkbox"/> Inundaciones   |
| <input type="checkbox"/> Riadas         |
| <input type="checkbox"/> Mazamorras     |
| <input type="checkbox"/> Heladas        |
| <input type="checkbox"/> Granizadas     |
| <input type="checkbox"/> Deslizamientos |

☐ No

64. ¿Sabe cuántos años atrás fue construido su baño o letrina?

SELECCIONE UNA OPCIÓN

- ☐ Si  
☐ No (Saltar a pregunta 65)

64.1. ¿Cuántos años atrás fue construido su baño o letrina?

\_\_\_\_\_ número de años

65. ¿Sabe cuántas veces hicieron reparaciones a su baño/letrina en los últimos 12 meses?

SELECCIONE UNA OPCIÓN

- ☐ Si  
☐ No (Saltar a pregunta 66)  
☐ No se hizo reparaciones (Saltar a pregunta 66)

65.1. ¿Cuántas veces/año hicieron reparaciones a su baño/letrina en los últimos 12 meses?

\_\_\_\_\_ vez/año

66. ¿Sabe cuántas veces hicieron mantenimiento a su baño/letrina en los últimos 12 meses?

SELECCIONE UNA OPCIÓN

- ☐ Si  
☐ No (Saltar a pregunta 67)  
☐ No se hizo mantenimiento (Saltar a pregunta 67)

66.1. ¿Cuántas veces/año hicieron mantenimiento a su baño/letrina en los últimos 12 meses?

\_\_\_\_\_ vez/año

67. ¿Cómo calificaría la condición de su baño o letrina en los últimos 12 meses?

SELECCIONE UNA OPCIÓN

- ☐ Muy buen estado  
☐ Buen estado  
☐ Mal estado  
☐ Muy mal estado  
☐ No sabe

68. ¿Cuáles considera que son los principales problemas del baño/letrina en su hogar?

SELECCIÓN MÚLTIPLE (TODAS LAS QUE APLIQUEN)

- ☐ Mal olor  
☐ Mal uso  
☐ Instalaciones deficientes  
☐ Desconocimiento en el manejo/mantenimiento de baño/letrinas.  
☐ Otros \_\_\_\_\_  
☐ No sabe  
☐ No tiene problemas

68.1. En los últimos 5 años, ¿Ha sido beneficiado con algún proyecto de construcción o mejora de baños/letrinas?

- ☐ Sí  
☐ No (**saltar a la pregunta 72**)

69. Si la respuesta fue afirmativa, ¿en qué consistió el(los) proyecto(s)?

SELECCIÓN MÚLTIPLE (TODAS LAS QUE APLIQUEN)

- ☐ Baño con descarga de agua  
☐ Letrina con descarga de agua  
☐ Letrina seca con piso  
☐ Baño ecológico  
☐ Instalación de lavamanos  
☐ Instalación de ducha  
☐ Construcción de piso en letrina  
☐ Conexión de baño/letrina a la red de alcantarillado  
☐ Otro \_\_\_\_\_

Aplicar pregunta 71 para las 2 opciones mencionadas por el encuestado  
Existe una pregunta filtro, si existe un segundo proyecto se muestra la pregunta 71 nuevamente, caso contrario continúa en la pregunta 72.

70. ¿Considera que el proyecto fue\_\_\_para su familia? Duplicar en QuestionPro  
SELECCIONE UNA OPCIÓN

- ☐ Muy útil
- ☐ Útil
- ☐ Poco útil

71. ¿Ha realizado el hogar algún tipo de inversión para mejorar su baño/letrina?  
☐ Sí  
☐ No (saltar a la pregunta 75)

72. ¿En qué consistió la inversión/mejora?

SELECCIÓN MÚLTIPLE (TODAS LAS QUE APLIQUEN)

- ☐ Construcción de piso en letrina
- ☐ Construcción de caseta para letrina
- ☐ Instalación de lavamanos
- ☐ Instalación de ducha
- ☐ Conexión de baño/letrina a la red de alcantarillado
- ☐ Otro \_\_\_\_\_

73. Si pregunta 54 respondió Ninguna instalación/el campo/el monte o uso de balde: ¿Cuáles considera que son las barreras para adquirir un baño en buen funcionamiento? REVISAR SALTO

SELECCIÓN MÚLTIPLE (TODAS LAS QUE APLIQUEN)

- ☐ Falta de recursos económicos
- ☐ Falta de capacitación en instalación, operación y mantenimiento
- ☐ Falta de interés
- ☐ Otro \_\_\_\_\_
- ☐ No sabe

Si el hogar reporta tener un/una niño/niña menor de 5 años:

74. ¿La última vez que [nombre del/la niño/a más pequeño] defecó donde se botaron sus heces?

SELECCIONE UNA OPCIÓN

- ☐ El/la niño/niña usó el baño o letrina con descarga de agua.
- ☐ En la letrina (con/sin piso)
- ☐ En drenaje o zanja
- ☐ En el basurero
- ☐ Enterró las heces
- ☐ En la superficie (calle, quebrada, río)
- ☐ Otro \_\_\_\_\_
- ☐ No sabe

En caso de que la encuestadora sea mujer y la entrevistada sea mujer adulta en edad reproductiva (18- 46 años), realizar las preguntas 74 a 76

Ahora le haré algunas preguntas sobre su aseo menstrual. Puede que las siguientes 3 preguntas le parezcan personales y es comprensible. Sin embargo, si usted accede a responder, sus respuestas ayudarán a entender cómo se manejan los desechos higiénicos de la menstruación y cuáles son sus necesidades para acceder a mejores servicios de higiene menstrual.

PREGUNTA PARA EL ENCUESTADOR - ¿Usted es hombre o mujer?

- ☐ Hombre (Saltar a pregunta 79)
- ☐ Mujer

SEXO DE LA PERSONA ENCUESTADA

- ☐ Hombre (Saltar a pregunta 79)
- ☐ Mujer de 18 a 46 años
- ☐ Mujer mayor a 46 años (Saltar a pregunta 79)

75. ¿Qué producto sanitario utiliza habitualmente durante su menstruación?

REVISAR FILTROS

SELECCIONE UNA OPCIÓN

- ☐ Toallas
- ☐ Tampones
- ☐ Copa menstrual
- ☐ Algodón
- ☐ Trapos o restos de ropa
- ☐ Periódico
- ☐ Otro (Explique): \_\_\_\_\_
- ☐ No hace uso de ningún producto sanitario
- ☐ No aplica

76. Si declaró tener baño o letrina (pregunta 54): Durante su última menstruación, ¿usó usted su baño/letrina para su aseo menstrual? REVISAR FILTROS

Por aseo menstrual se entiende prácticas como cambio de toallas higiénicas, algodón, trapos o cualquier producto sanitario.

SELECCIONE UNA OPCIÓN

- ☐ Sí (saltar a la pregunta 78)
- ☐ No
- ☐ No aplica (saltar a la pregunta 78)

77.1 ¿Por qué no?

\_\_\_\_\_

77. ¿La última vez que tuvo su periodo menstrual, donde botó el producto sanitario usado?

SELECCIONE UNA OPCIÓN

- ☐ En la taza de baño/letrina
- ☐ En el basurero del baño/letrina
- ☐ En otro basurero de la casa
- ☐ En la superficie (calle, quebrada, río).
- ☐ Otro \_\_\_\_\_
- ☐ No aplica

En esta sección de la encuesta (Preguntas 79 a 81), el encuestador debe consultar si es posible que le muestren las instalaciones donde las personas del hogar se lavan las manos y anotar lo que corresponda.

78. ¿Me puede mostrar donde se lavan las manos usualmente?

Observar las instalaciones y marcar una opción

- ☐ Instalación observada (lavamanos/ grifo)
  - ☐ En la Vivienda
  - ☐ En el terreno/patio
- ☐ Objeto móvil observado (balde/jarra/recipiente)
- ☐ Ninguna instalación en vivienda/patio/terreno
- ☐ Sin permiso de observar (**saltar a la pregunta 82**)

79. Observar disponibilidad de agua

Observar las instalaciones y marcar una opción

- ☐ agua disponible
- ☐ agua no disponible

80. Observar disponibilidad de jabón

Observar las instalaciones y marcar una opción

- ☐ jabón o detergente disponible
- ☐ jabón o detergente no disponible

Ahora le preguntaré sobre cómo se manejan las aguas sucias en el hogar.

81. ¿Dónde botan habitualmente el agua sucia usada en la cocina, lavado y aseo personal (incluyendo baño con descarga de agua)?

Verificar mediante observación de ser posible

SELECCIONE UNA OPCIÓN

- ☐ Desagüe conectado a la red de alcantarillado
- ☐ Desagüe conectado a cámara séptica
- ☐ Desagüe conectado a pozo ciego
- ☐ Desagüe a patio (**saltar a la pregunta 85**)
- ☐ Desagüe a cuerpo de agua (arroyo, canal, otro) (**saltar a la pregunta 85**)
- ☐ No sabe (**saltar a la pregunta 85**)

82. ¿Hace algún mantenimiento al sistema de desagüe?

- ☐ Si → cuál?: \_\_\_\_\_
- ☐ No (**saltar a la pregunta 85**)
- ☐ No sabe/No responde (**saltar a la pregunta 85**)

83. Si responde Sí, ¿Quién se encarga principalmente del mantenimiento del sistema de desagüe?

SELECCIONE UNA OPCIÓN

- ☐ Mujer adulta (18 a 59 años)
- ☐ Hombre adulto (18 a 59 años)
- ☐ Niña (entre 5 y 17 años)
- ☐ Niño (entre 5 y 17 años)
- ☐ El hogar en su conjunto
- ☐ Otro (Explique): \_\_\_\_\_

84. ¿Alguna vez ha reutilizado las aguas usadas provenientes de cocinar, lavar o aseo personal para riego de jardín/cultivos en los últimos 12 meses?

SELECCIONE UNA OPCIÓN

- ☐ Sí (**saltar a la sección 6.4**)
- ☐ No
- ☐ No sabe

85. ¿Estaría dispuesto a utilizar aguas usadas domésticas tratadas para riego de jardín/cultivos?

SELECCIONE UNA OPCIÓN

- ☐ Sí
- ☐ No

## 6.4 Manejo de residuos sólidos

**SUBSECCIÓN F:** El objetivo es identificar el tipo de manejo de residuos sólidos dentro del hogar.

Permítame hacerle unas preguntas sobre como maneja la basura en el hogar.

86. ¿Sabe qué se hace con la basura que genera el hogar?

SELECCIONE UNA OPCIÓN

- ☐ Si
- ☐ No (**Saltar a pregunta 89**)

86.1. ¿Habitualmente qué hace con la basura que genera el hogar? (la forma más común de desechar cada residuo)

Seleccione el tipo de manejo que corresponda al tipo de basura. Si el hogar no selecciona la basura puede marcar el tipo de manejo que corresponda para todos los tipos de basura. Ver siguiente ejemplo:

| TIPO DE MANEJO                            | TIPO DE RESIDUOS SÓLIDOS |       |        |          |       |       |
|-------------------------------------------|--------------------------|-------|--------|----------|-------|-------|
|                                           | Residuos orgánicos       | Metal | Vidrio | Plástico | Papel | Otros |
| Es recolectada por el municipio o empresa | x                        | x     | x      | x        | x     | x     |

| TIPO DE MANEJO                                  | TIPO DE RESIDUOS SÓLIDOS |       |        |          |       |       |         |
|-------------------------------------------------|--------------------------|-------|--------|----------|-------|-------|---------|
|                                                 | Residuos orgánicos       | Metal | Vidrio | Plástico | Papel | Otros | N/A     |
| Es recolectada por el municipio o empresa       |                          |       |        |          |       |       |         |
| Es recolectada por persona particular           |                          |       |        |          |       |       |         |
| La deposita en el basurero público o contenedor |                          |       |        |          |       |       |         |
| La tira al patio o terreno                      |                          |       |        |          |       |       |         |
| La quema o entierra                             |                          |       |        |          |       |       |         |
| La tira a la calle                              |                          |       |        |          |       |       |         |
| La tira al río/acequia/drenaje                  |                          |       |        |          |       |       |         |
| Otro (Explique): _____                          |                          |       |        |          |       |       | Ir Pg88 |

86.2. Especifique el **OTRO** tipo de manejo de la basura

\_\_\_\_\_

87. ¿Quién es responsable principal del manejo de la basura en su hogar?

SELECCIONE UNA OPCIÓN

- ☐ Mujer adulta (18 a 59 años)  
☐ Hombre adulto (18 a 59 años)  
☐ Niña (entre 5 y 17 años)  
☐ Niño (entre 5 y 17 años)  
☐ El hogar en su conjunto  
☐ Otro (Explique): \_\_\_\_\_

88. ¿Usted reutiliza los residuos orgánicos (ej. cocina/agricultura) para hacer abono/compostaje?

Verificar mediante observación de ser posible

SELECCIONE UNA OPCIÓN

- ☐ Sí  
☐ No (**salta a la Sección 7**)  
☐ No sabe (**salta a la Sección 7**)

89. ¿Qué hace con el compost que genera?

Verificar mediante observación de ser posible

SELECCIÓN MÚLTIPLE (TODAS LAS QUE APLIQUEN)

- ☐ Lo aplica a cultivos  
☐ Lo aplica a jardinería  
☐ Es recolectado por el municipio  
☐ Otro \_\_\_\_\_

## SECCIÓN 7. SALUD

A continuación, le haré unas breves preguntas sobre la salud en el hogar.

1. Durante los últimos 12 meses, ¿usted o algún miembro de la familia tuvo algunos de estos síntomas, enfermedades o problemas?

SELECCIÓN MÚLTIPLE (TODAS LAS QUE APLIQUEN)

- ☐ Diarrea  
☐ Tifoidea  
☐ Salmonela  
☐ Anemia  
☐ Hepatitis  
☐ Accidente durante trabajo  
☐ Ningún Problema  
☐ Otro problema \_\_\_\_\_

2. ¿Visitaron al médico a causa de ese problema?

☐ Sí (**salta a la Sección 8**)

☐ No

☐ No sabe/No responde (**salta a la Sección 8**)

3. ¿Por qué no fueron al médico?

SELECCIONE UNA OPCIÓN

- ☐ Porque no fue muy grave  
☐ Porque no estaban atendiendo en la posta de salud  
☐ Porque la posta de salud queda muy lejos  
☐ Porque no tiene recursos para los gastos médicos  
☐ Otro \_\_\_\_\_

## SECCIÓN 8 . TENENCIA, ACCESO Y USO DE LA TIERRA

En esta sección, le preguntaré sobre el acceso y uso de la tierra que tiene el hogar.

1. ¿Tiene terrenos dentro o fuera de su comunidad?

☐ Sí, dentro de mi comunidad

☐ Sí, fuera de mi comunidad

☐ No (**salta a la Sección 11**)

2. ¿Cuál es el área total de sus tierras? Incluyendo las que tiene dentro y fuera de su comunidad

SELECCIONE UNA OPCIÓN

☐ Ha (**hacer la transformación correspondiente desde otra unidad**)

3. ¿Cuánto tarda en llegar a sus terrenos desde su casa?

Al terreno más cercano: \_\_\_\_\_ minutos

Al terreno más lejano: \_\_\_\_\_ minutos

4. ¿Cómo se traslada habitualmente hasta sus terrenos?

SELECCIONE UNA OPCIÓN

- ☐ Caminando  
☐ Vehículo propio  
☐ Bicicleta  
☐ Motocicleta  
☐ A caballo  
☐ Otro \_\_\_\_\_

5. ¿Cuántas veces por semana va a sus terrenos?

SELECCIONE UNA OPCIÓN

- ☐ Todos los días  
☐ Día por medio/Pasado un día  
☐ 1 a 2 veces por semana  
☐ Otra frecuencia \_\_\_\_\_

6. ¿Qué tipo de propiedad tiene sobre sus terrenos?

SELECCIONE UNA OPCIÓN

- ☐ Título de propiedad individual  
☐ Propietario sin escritura  
☐ Tierra comunitaria  
☐ Alquilada (**salta a la pregunta 8**)  
☐ Prestada (de un familiar o pariente) (**salta a la pregunta 8**)  
☐ Otro \_\_\_\_\_

7. ¿A nombre de quién está el título/papeles de sus terrenos?

SELECCIONE UNA OPCIÓN

- ☐ Entrevistado(a)  
☐ Esposa(o)  
☐ Ambos  
☐ Padres de alguno de los jefes de hogar  
☐ Parientes de alguno de los jefes de hogar  
☐ Otros \_\_\_\_\_

8. ¿Qué usos les dio a sus terrenos los últimos 12 meses? y ¿qué área de sus terrenos emplea para cada una de esas actividades?

**Anotar todas las actividades que desarrolle la familia en sus terrenos y el área involucrada, sea en ha o m2**

| Uso                         | Área | Unidad (Ha o m2) | Secciones correspondientes |
|-----------------------------|------|------------------|----------------------------|
| Agricultura                 |      |                  | Sección 9                  |
| Ganadería (área de pastura) |      |                  | Sección 10                 |
| Floricultura                |      |                  | Sección 9                  |
| Frutales                    |      |                  | Sección 9                  |

|                |  |                                                                                                                       |           |
|----------------|--|-----------------------------------------------------------------------------------------------------------------------|-----------|
| Barbecho       |  |                                                                                                                       | Sección 9 |
| Bosque         |  | Tipo de árboles más abundante:<br>Churqui, palqui, queñua, molle, cactus, sauce, eucalipto, pino ciprés, álamo, olmo) |           |
| Otro uso _____ |  |                                                                                                                       |           |
| ÁREA TOTAL     |  | Debe coincidir con el área mencionada en pregunta 2, siempre que los usos no se superpongan                           |           |

## SECCIÓN 9. AGRICULTURA Y RIEGO

1. ¿Usted considera que su actividad agrícola es importante para la economía/subsistencia de su hogar?

- ☐ Sí  
☐ No (**salta a la Sección 10**)

*Ahora le haré algunas preguntas sobre el riego y la actividad agrícola del hogar.*

2. Mencione el número de principales productos que cultivó en los últimos 12 meses: \_\_\_\_\_

**2.1. Mencione los 5 principales productos que cultivó en los últimos 12 meses, la superficie sembrada, número de cosechas para cada uno, sus cantidades producidas, consumidas, vendidas y tipo de riego**

**Se definirá una lista de productos para facilitar la anotación del encuestador**

| Cultivo  | Superficie sembrada Ha | Tipo de cultivo Anual: A Plurianual: P | Cantidad total cosechada en los últimos 12 meses | Número de cosechas por año | Cantidad consumida | Cantidad vendida | Fuente de agua para riego<br>1. Ríos/arroyos<br>2. Agua de lluvia<br>3. Tanques<br>4. Infraestructura para captación de agua<br>5. Represas, estanques o atajados<br>6. Pozos<br>7. Vertientes de agua<br>8. Otro _____ |
|----------|------------------------|----------------------------------------|--------------------------------------------------|----------------------------|--------------------|------------------|-------------------------------------------------------------------------------------------------------------------------------------------------------------------------------------------------------------------------|
| 1. _____ |                        |                                        |                                                  |                            |                    |                  |                                                                                                                                                                                                                         |
| 2. _____ |                        |                                        |                                                  |                            |                    |                  |                                                                                                                                                                                                                         |
| 3. _____ |                        |                                        |                                                  |                            |                    |                  |                                                                                                                                                                                                                         |
| 4. _____ |                        |                                        |                                                  |                            |                    |                  |                                                                                                                                                                                                                         |
| 5. _____ |                        |                                        |                                                  |                            |                    |                  |                                                                                                                                                                                                                         |

**No olvidar anotar las unidades en cada columna**

3. ¿Cambi6 sus principales cultivos/productos los 6ltimos 5 a6os? 6O cultiv6 los mismos 5 productos en los 6ltimos 5 a6os?

SELECCIONE UNA OPCI6N

☐ S6, mis 5 principales productos fueron los mismos los 6ltimos 5 a6os (**saltar a la pregunta 6**)

☐ No, mis 5 principales productos fueron diferentes los 6ltimos 5 a6os

4. 6Qu6 productos cultiv6 antes, en los 6ltimos 5 a6os, que ahora ya no cultiva o ya dej6 de ser importante para su econom6a?

**Puede se6alar hasta 5 productos. Los productos tienen que ser diferentes a los de la tabla de la pregunta 2**

1 \_\_\_\_\_

2 \_\_\_\_\_

4 \_\_\_\_\_

5 \_\_\_\_\_

5. 6Por qu6 tuvo que cambiar sus cultivos, en los 6ltimos 5 a6os?

SELECCI6N M6LTIPLE (TODAS LAS QUE APLIQUEN)

☐ Los cultivos actuales le generan m6s ingresos econ6micos

☐ Los cultivos actuales tienen mayores rendimientos (productividad)

☐ Los cultivos actuales tienen m6s demanda

☐ Los cultivos actuales tienen mejores precios

☐ Los cultivos actuales requieren menos agua

☐ Los cultivos actuales son m6s resistentes a sequ6as

☐ Los cultivos actuales son m6s resistentes a inundaciones

☐ Los cultivos actuales son m6s resistentes a heladas

☐ Los cultivos actuales son m6s resistentes a plagas

☐ Otros \_\_\_\_\_

6. 6Qui6n(es) decide(n) sobre la distribuci6n de agua para riego en su comunidad?

SELECCIONE UNA OPCI6N

☐ Una familia de la comunidad

☐ Pocas familias de la comunidad

☐ Toda la comunidad

☐ El juez de agua

☐ Alguien ajeno a la comunidad

☐ No sabe/No responde

7. 6Cu6nto paga por el agua de riego?

ESCOGER LA FRECUENCIA QUE CORRESPONDA

☐ Bs/mes

☐ Bs/a6o

☐ Bs/otra frecuencia

☐ No paga (**saltar a la pregunta 9**)

8. 6A qui6n se realizan los pagos por el agua para riego?

SELECCIONE UNA OPCI6N

☐ Asociaci6n de regantes de la comunidad

☐ Juez de agua

☐ Otro \_\_\_\_\_

9. 6Considera que sus cultivos tuvieron suficiente agua los 6ltimos 12 meses?

☐ S6 (**saltar a la pregunta 11**)

☐ No

10. 6Durante qu6 meses la disponibilidad de agua no fue suficiente para el riego de sus cultivos?

**Marque los meses en los que el agua no fue suficiente para riego**

| OCT                      | NOV                      | DIC                      | ENE                      | FEB                      | MAR                      | ABR                      | MAY                      | JUN                      | JUL                      | AGO                      | SEP                      |
|--------------------------|--------------------------|--------------------------|--------------------------|--------------------------|--------------------------|--------------------------|--------------------------|--------------------------|--------------------------|--------------------------|--------------------------|
| <input type="checkbox"/> |

11. 6Cu6les considera que son los principales problemas para su hogar, en relaci6n al agua para riego?

**No leer la lista, escuchar la respuesta del entrevistado y seleccionar las opciones que corresponda.**

SELECCI6N M6LTIPLE (TODAS LAS QUE APLIQUEN)

☐ Instalaciones deficientes o malas

☐ Abastecimiento insuficiente

☐ Largas distancias hacia las fuentes de agua

☐ Escasez de agua en las fuentes actuales

☐ Escasez de agua por temporadas

☐ Fuentes de agua contaminadas por miner6a

☐ Fuentes de agua contaminadas por alcantarillado/desag6es/basura

☐ Fuentes contaminadas por fertilizantes

☐ Distribuci6n desigual del agua entre los productores

☐ Otras \_\_\_\_\_

**12. En los últimos 12 meses, ¿quiénes trabajaron físicamente en las actividades agrícolas?**

**Marcar en la tabla todos los miembros del hogar que participaron en cada una de las actividades listadas**

| Miembro del hogar                      | Preparar terreno | Siembra | Riego | Fumigación | Deshierbe | Cosecha | Otro |
|----------------------------------------|------------------|---------|-------|------------|-----------|---------|------|
| Entrevistado(a)                        |                  |         |       |            |           |         |      |
| Esposa(o)                              |                  |         |       |            |           |         |      |
| Ambos                                  |                  |         |       |            |           |         |      |
| Hijos                                  |                  |         |       |            |           |         |      |
| Hijas                                  |                  |         |       |            |           |         |      |
| El hogar en su conjunto                |                  |         |       |            |           |         |      |
| Peones contratados                     |                  |         |       |            |           |         |      |
| Familiares o parientes fuera del hogar |                  |         |       |            |           |         |      |
| Otro _____                             |                  |         |       |            |           |         |      |

**13. ¿Cuáles son los 3 principales problemas que tiene como agricultor?**

**Ordenar por orden de importancia, siendo 1 el más importante.**

**No leer la lista, escuchar la respuesta del entrevistado y seleccionar las opciones que corresponda.**

SELECCIÓN MÚLTIPLE (TODAS LAS QUE APLIQUEN)

- ☐ Insuficiente agua para riego
- ☐ Riadas
- ☐ Sequía
- ☐ Falta de mercados
- ☐ Altos costos de transporte
- ☐ Caminos deficientes hacia los mercados
- ☐ Baja productividad/fertilidad del suelo
- ☐ Alto costos de fertilizantes.
- ☐ Altos costos de insumos (semillas, mano de obra, etc.)
- ☐ Altos costos de insumos (herbicidas, pesticidas, insecticidas, etc.)
- ☐ Reducción de precios de los productos
- ☐ Plagas o enfermedades que afectan cultivos
- ☐ Falta de mano de obra
- ☐ Dificultades para acceder a créditos
- ☐ Contaminación del agua
- ☐ Contaminación del suelo
- ☐ Otro \_\_\_\_\_

**14. En los últimos 5 años, ¿Ha sido beneficiado con algún proyecto de riego?**

- ☐ Si
- ☐ No (saltar a la pregunta 18)

**15. ¿En qué consistió el(los) proyecto(s)?**

SELECCIÓN MÚLTIPLE (TODAS LAS QUE APLIQUEN)

- ☐ Revestimiento de canal
- ☐ Riego por goteo
- ☐ Riego por aspersión
- ☐ Atajado/Estanque para riego
- ☐ Multicompuertas (tubería que distribuye el agua en el terreno y lo mantiene húmedo)
- ☐ Otro \_\_\_\_\_

**16. ¿Quiénes financiaron el(los) proyecto(s)?**

**Hacer referencia a los 2 más importantes. Duplicar en QuestionPro**

SELECCIÓN MÚLTIPLE (TODAS LAS QUE APLIQUEN)

- ☐ ONG
- ☐ Gobierno departamental
- ☐ Gobierno municipal
- ☐ Otro \_\_\_\_\_

**17. ¿Considera que el proyecto fue \_\_\_\_\_ para su familia?**

**(Hacer referencia a los 2 más importantes) Duplicar en QuestionPro.**

**SELECCIONE UNA OPCIÓN**

- ☐ Muy útil
- ☐ Útil
- ☐ Poco útil

**Existe una pregunta filtro, si existe un segundo proyecto se muestra la pregunta 16 nuevamente, caso contrario continúa en la pregunta 18.**

**18. En los últimos 5 años, ¿Ha realizado algún tipo de inversión personal para mejorar el riego para sus cultivos?**

- ☐ Si
- ☐ No (saltar a la Sección 10)

**19. ¿En qué consistió la inversión/mejora?**

SELECCIÓN MÚLTIPLE (TODAS LAS QUE APLIQUEN)

- ☐ Reemplazo de tuberías para riego
- ☐ Revestimiento de canal
- ☐ Riego por goteo
- ☐ Riego por aspersión
- ☐ Atajado/Estanque para riego
- ☐ Multicompuertas (tubería que distribuye el agua en el terreno y lo mantiene húmedo)
- ☐ Otro \_\_\_\_\_

## SECCIÓN 10. GANADERÍA

- a. ¿Usted considera que su actividad ganadera es importante para la economía/subsistencia de su familia?

☐ Sí  
☐ No **(saltar a la Sección 11)**

*En esta sección, le haré preguntas sobre la actividad ganadera del hogar*

| ¿Qué tipo de ganado tiene y qué usos le da?<br>Tipo de ganado | Cantidad | Usos                                                                                                                                                                                                                                                               | Consumo propio %<br>(últimos 12 meses) | Venta (%)<br>(últimos 12 meses) |
|---------------------------------------------------------------|----------|--------------------------------------------------------------------------------------------------------------------------------------------------------------------------------------------------------------------------------------------------------------------|----------------------------------------|---------------------------------|
| Cabras                                                        |          | <input type="checkbox"/> Carne<br><input type="checkbox"/> Ganado en pie<br><input type="checkbox"/> Leche y derivados<br><input type="checkbox"/> Cuero<br><input type="checkbox"/> Guano<br><input type="checkbox"/> Otro _____                                  |                                        |                                 |
| Llamas                                                        |          | <input type="checkbox"/> Carne<br><input type="checkbox"/> Ganado en pie<br><input type="checkbox"/> Lana<br><input type="checkbox"/> Cuero<br><input type="checkbox"/> Guano<br><input type="checkbox"/> Otro _____                                               |                                        |                                 |
| Ovejas                                                        |          | <input type="checkbox"/> Carne<br><input type="checkbox"/> Ganado en pie<br><input type="checkbox"/> Leche y derivados<br><input type="checkbox"/> Lana<br><input type="checkbox"/> Cuero<br><input type="checkbox"/> Guano<br><input type="checkbox"/> Otro _____ |                                        |                                 |
| Reses                                                         |          | <input type="checkbox"/> Carne<br><input type="checkbox"/> Ganado en pie<br><input type="checkbox"/> Leche y derivados<br><input type="checkbox"/> Cuero<br><input type="checkbox"/> Guano<br><input type="checkbox"/> Otro _____                                  |                                        |                                 |
| Chanchos                                                      |          | <input type="checkbox"/> Carne<br><input type="checkbox"/> Ganado en pie<br><input type="checkbox"/> Guano<br><input type="checkbox"/> Otro _____                                                                                                                  |                                        |                                 |
| Caballos                                                      |          | <input type="checkbox"/> Ganado en pie<br><input type="checkbox"/> Transporte<br><input type="checkbox"/> Guano<br><input type="checkbox"/> Otro _____                                                                                                             |                                        |                                 |
| Aves de corral                                                |          | <input type="checkbox"/> Carne<br><input type="checkbox"/> Huevos<br><input type="checkbox"/> Animal en pie<br><input type="checkbox"/> Otro _____                                                                                                                 |                                        |                                 |

| ¿Qué tipo de ganado tiene y qué usos le da?<br>Tipo de ganado | Cantidad | Usos                                                                                                                                                                                                                                                               | Consumo propio %<br>(últimos 12 meses) | Venta (%)<br>(últimos 12 meses) |
|---------------------------------------------------------------|----------|--------------------------------------------------------------------------------------------------------------------------------------------------------------------------------------------------------------------------------------------------------------------|----------------------------------------|---------------------------------|
| Otros _____                                                   |          | <input type="checkbox"/> Carne<br><input type="checkbox"/> Ganado en pie<br><input type="checkbox"/> Leche y derivados<br><input type="checkbox"/> Lana<br><input type="checkbox"/> Cuero<br><input type="checkbox"/> Guano<br><input type="checkbox"/> Otro _____ |                                        |                                 |

3. ¿Qué fuentes de agua usa para sus animales?  
 SELECCIÓN MÚLTIPLE (TODAS LAS QUE APLIQUEN)

☐ Recolección de agua de lluvia  
☐ Infraestructura para la captación de agua  
☐ Agua superficial (río/lago/represa/arroyo/acequia)  
☐ Vertiente/ojo de agua  
☐ Otro \_\_\_\_\_

4. ¿Cree que sus animales tuvieron suficiente agua los últimos 12 meses?  
☐ Sí **(saltar a la pregunta 7)**  
☐ No

5. ¿Durante qué meses la disponibilidad de agua no fue suficiente para su ganado?

| OCT | NOV | DIC | ENE | FEB | MAR | ABR | MAY | JUN | JUL | AGO | SEP |
|-----|-----|-----|-----|-----|-----|-----|-----|-----|-----|-----|-----|
|     |     |     |     |     |     |     |     |     |     |     |     |

**Marque los meses en los que el agua no fue suficiente para su ganado**

6. ¿La falta de agua siempre ocurre en los mismos meses o ha cambiado en los últimos años?  
 SELECCIONE UNA OPCIÓN  
☐ Si, siempre ocurre en los mismos meses  
☐ No, la disponibilidad de agua ha cambiado los últimos años  
☐ No sabe/No responde

7. En el hogar, ¿quién es dueño del ganado/aves de corral?  
 SELECCIÓN MÚLTIPLE (TODAS LAS QUE APLIQUEN)

☐ Entrevistado(a)  
☐ Esposa(o)  
☐ Ambos  
☐ Hijos  
☐ Hijas  
☐ El hogar en su conjunto  
☐ Familiares o parientes fuera del hogar  
☐ Persona ajena al hogar  
☐ Otro \_\_\_\_\_

8. ¿Han vendido algún ganado y/o aves de corral en los últimos 12 meses?

☐ Sí ☐ No

9. ¿Han comprado ganado/aves de corral en los últimos 12 meses?

☐ Sí ☐ No

10. En los últimos 5 años, ¿ha realizado algún tipo de inversión personal para mejorar la provisión de agua para sus animales/ganado?

☐ Sí ☐ No

## SECCIÓN 11. MINERÍA

*En esta sección, le haré preguntas sobre la actividad minera que realiza*

1. ¿Trabajó en minería los últimos 12 meses? (Puede ser durante ciertos meses o todo el tiempo)

☐ Si

☐ No (**salta a la Sección 12**)

2. ¿Este trabajo fue significativo para la economía del hogar?

☐ Sí

☐ No (**salta a sección 12**)

3. ¿Trabaja con alguna cooperativa minera, empresa o de manera independiente?

SELECCIONE UNA OPCIÓN

☐ Cooperativa

☐ Empresa privada (empleado dependiente)

☐ Independiente (concesiones o cuadrículas mineras)

4. ¿En qué tipo de minería trabaja?

SELECCIÓN MÚLTIPLE (TODAS LAS QUE APLIQUEN)

☐ Minería metálica superficial, a cielo abierto

☐ Minería metálica en mina subterránea

☐ Minería no metálica superficial, a cielo abierto

5. En los últimos 5 años, ¿alguna vez tuvo que dedicarse a otra actividad porque el ingreso de la minería fue muy reducido?

☐ Sí

☐ No (**salta a la pregunta 7**)

6. ¿A qué otra actividad se dedicó?

SELECCIONE UNA OPCIÓN

☐ Agricultura

☐ Ganadería

☐ Transporte

☐ Comercio

☐ Otro \_\_\_\_\_

7. ¿Qué tan importante es el agua en la actividad minera en la que usted trabaja?

SELECCIONE UNA OPCIÓN

☐ Muy importante

☐ Poco importante

☐ Nada importante (**salta a la Sección 12**)

8. ¿Por qué es importante?

SELECCIÓN MÚLTIPLE (TODAS LAS QUE APLIQUEN)

☐ Se necesita determinada cantidad de agua para sacar/separar los metales/minerales

☐ Se necesita buena calidad de agua para para sacar/separar los metales/minerales

☐ Para lavar el metal/mineral

☐ El agua influye en la cantidad de metal/mineral que se saca

☐ El agua influye en la calidad de metal/mineral que se saca

☐ Otro \_\_\_\_\_

## SECCIÓN 12. SEGURIDAD HUMANA

### 12.1 Seguridad alimentaria

*Ahora voy a hacerle algunas preguntas relacionadas con la alimentación en su hogar.*

Durante los ÚLTIMOS 12 MESES, ha habido algún momento en que, **por falta de dinero u otros recursos**:

1. Se haya preocupado por no tener suficientes alimentos para comer

☐ Sí ☐ No

2. No haya podido comer alimentos sanos o nutritivos

☐ Sí ☐ No

3. Haya comido poca variedad de alimentos

☐ Sí ☐ No

4. Haya tenido que saltarse una comida en el día

☐ Sí ☐ No

5. Haya comido menos de lo que pensaba que debía comer

☐ Sí ☐ No

6. Su hogar se haya quedado sin alimentos

☐ Sí ☐ No

7. Haya sentido hambre, pero no comió

☐ Sí ☐ No

8. Haya dejado de comer durante todo un día

☐ Sí ☐ No

## 12.2 Riesgos climáticos y problemas ambientales

*Ahora me gustaría preguntarle sobre los problemas ambientales y climáticos que afectan al hogar*

9. ¿Cuáles fueron los principales riesgos naturales que enfrentó su hogar los últimos 12 meses? Clasificar por tipología

SELECCIÓN MÚLTIPLE (TODAS LAS QUE APLIQUEN)

- ☐ Sequías
- ☐ Inundaciones (agua detenida por un tiempo)
- ☐ Riadas (crecida del río que ingresa a la comunidad, pero no permanece por mucho tiempo)
- ☐ Mazamoras (crecida de río con arrastre de material y lodo)
- ☐ Heladas
- ☐ Granizadas
- ☐ Deslizamientos
- ☐ Contaminación de las fuentes de agua
- ☐ Otro \_\_\_\_\_

**Dependiendo de la respuesta, el encuestador realizará las siguientes preguntas para cada tipo de riesgo**

10. ¿Cuáles fueron los principales problemas que enfrentó su hogar a causa de: (riesgo)?

**No leer la lista, escuchar la respuesta del entrevistado y seleccionar las opciones que corresponda.**

SELECCIÓN MÚLTIPLE (TODAS LAS QUE APLIQUEN)

- ☐ Daños a infraestructura de agua potable y/o saneamiento
- ☐ Enfermedades
- ☐ Pérdida de cultivos
- ☐ Pérdida de ganado/animales de corral
- ☐ Baja productividad de cultivos
- ☐ Insuficientes ingresos para cubrir la alimentación en el hogar
- ☐ Pérdida de accesibilidad a la comunidad
- ☐ Hijos(as) no fueron al colegio
- ☐ Traslado de comunidad
- ☐ Trabajos o empleos adicionales del jefe de hogar
- ☐ Trabajos o empleos adicionales de la jefa de hogar
- ☐ Hijos menores tuvieron que buscar empleo
- ☐ Hijas menores tuvieron que buscar empleo
- ☐ Migración de algún miembro de su hogar
- ☐ Otro \_\_\_\_\_

**Aplicar esta pregunta a todos los problemas mencionados en la pregunta 10:**

11. En el último evento de (riesgo), Si hubo afectación de ganado y/o cultivos, cuánto ganado/producto perdió?

\_\_\_\_\_ Cabezas de \_\_\_\_\_  
\_\_\_\_\_ Quintales/arrobas/otra unidad \_\_\_\_\_ de \_\_\_\_\_

**Aplicar esta pregunta a todos los problemas mencionados en la pregunta 10:**

12. ¿Cuántas veces su hogar ha sido afectado por (riesgo) en los últimos 5 años?

\_\_\_\_\_ veces

13. ¿Tiene usted alguna señal de que ocurrirá un evento climático como granizadas, sequías, heladas, riadas?

SELECCIÓN MÚLTIPLE (TODAS LAS QUE APLIQUEN)

\_\_\_ Sí →Cuál?

\_\_\_ Alertas emitidas por instituciones (alcaldía, gobernación)

\_\_\_ Comunicación con otras comunidades

\_\_\_ Señales ambientales:

\_\_\_ Presencia de nubes

\_\_\_ Ausencia de nubes

\_\_\_ Lluvia en días anteriores

\_\_\_ Lluvia en meses anteriores

\_\_\_ Cambios en la vegetación

\_\_\_ Cambios en la calidad del agua

\_\_\_ Presencia o ausencia de ciertos animales

\_\_\_ Comportamiento de ciertos animales

\_\_\_ Otros \_\_\_\_\_

\_\_\_ No

14. ¿Cree que su sustento familiar depende del abastecimiento de agua?

\_\_\_ Si

\_\_\_ No (saltar a la pregunta 17)

15. ¿En qué casos su sustento depende del abastecimiento de agua?

**No leer la lista, escuchar la respuesta del entrevistado y seleccionar las opciones que corresponda.**

SELECCIÓN MÚLTIPLE (TODAS LAS QUE APLIQUEN)

\_\_\_ Producción agrícola

\_\_\_ Producción artesanal

\_\_\_ Producción de derivados de actividad ganadera

\_\_\_ Venta de comida/bebidas elaboradas en el hogar

\_\_\_ Crianza de ganado

\_\_\_ Minería

\_\_\_ Trabajo de pesca

\_\_\_ Otros \_\_\_\_\_

16. ¿En qué medida diría que su sustento depende del agua?

SELECCIONE UNA OPCIÓN

- ☐ En gran medida  
☐ En cierta medida  
☐ En ninguna medida

### 12.3 Relación comunitaria

*En esta sección, le haré una pregunta sobre la convivencia en la comunidad*

17. ¿Usted considera que la relación de convivencia social y comunitaria entre las familias de su comunidad es:

SELECCIONE UNA OPCIÓN

- ☐ Muy fuerte  
☐ Fuerte  
☐ Ni débil/ni fuerte  
☐ Algo débil  
☐ Muy débil

### 12.4 Conflictos

18. ¿Considera que en su comunidad existe conflictos por tierras?

☐ Sí ☐ No **(saltar a la pregunta 20)**

19. ¿Cree que esos conflictos se podrían volver violentos en algún momento?

☐ Sí ☐ No

20. ¿Considera que su comunidad tiene conflictos de tierras con otra(s) comunidad(es)?

☐ Sí ☐ No **(saltar a la pregunta 22)**

21. ¿Cree que esos conflictos se podrían volver violentos en algún momento?

☐ Sí ☐ No

22. ¿Considera que en su comunidad existe conflictos por el agua?

☐ Sí ☐ No **(saltar a la pregunta 24)**

23. ¿Cree que esos conflictos se podrían volver violentos en algún momento?

☐ Sí ☐ No

24. ¿Considera que su comunidad tiene conflictos de agua con otra(s) comunidad(es)?

☐ Sí ☐ No **(saltar a la pregunta 26)**

25. ¿Cree que esos conflictos se podrían volver violentos en algún momento?

☐ Sí ☐ No

26. ¿Considera que en su comunidad existe conflictos relacionados con la actividad minera?

☐ Sí ☐ No **(saltar a la pregunta 28)**

27. ¿Cree que esos conflictos se podrían volver violentos en algún momento?

☐ Sí ☐ No

28. ¿Considera que su comunidad tiene conflictos relacionados con la actividad minera con otra(s) comunidad(es)?

☐ Si ☐ No **(saltar a la pregunta 30)**

29. ¿Cree que esos conflictos se podrían volver violentos en algún momento?

☐ Sí ☐ No

30. ¿Considera que en su comunidad existen otro tipo de conflictos sociales, violencia o inseguridad?

☐ Sí ☐ No

31. Si responde Sí, cuál(es).....?

Las opciones para esta pregunta deberán cerrarse después de la prueba piloto

### FIN DE LA ENCUESTA Y CALIDAD DE LA INFORMACIÓN

*Hemos llegado al final de la encuesta. Muchas gracias por su tiempo, que tenga un buen día.*

#### Observaciones a la información recolectada

PARTE A SER LLENADA POR EL ENCUESTADOR - **NO PREGUNTAR AL ENTREVISTADO**

a. ¿El entrevistado mostró alguna señal de desconfianza, falta de honestidad, miedo al encuestador o al estudio, hostilidad, enfado, resentimiento, o trató de evitar preguntas durante la encuesta?

☐ Sí ☐ No

b. ¿Usted considera que la calidad de la información recolectada en esta encuesta fue?:

SELECCIONE UNA OPCIÓN

- ☐ Alta **(saltar a pregunta 4)**  
☐ Media  
☐ Baja

c. Describa brevemente por qué considera que la calidad de la información fue media o baja

---

---

d. Otro tipo de observaciones que considere importantes

---

---
